# Supplementary material
Source: MDPI journal article supplement (https://www.mdpi.com/search?q=ijerph-16-00366)
Supplement: s001 [file ijerph-16-00366-s001.pdf]

**Supplemental Table S1.** Full list of environmental chemical hazards on reproduction.

| Category | CAS Number                                     | Name of the reproductive risk factor                                                     |
|----------|------------------------------------------------|------------------------------------------------------------------------------------------|
| 1        | 630-08-0                                       | carbon monoxide                                                                          |
| 1        | 25808-74-6                                     | lead hexafluorosilicate                                                                  |
| 1        | 94551-87-8                                     | slimes and sludges, copper electrolyte refining, decopperised                            |
| 1        | 68130-19-8                                     | silicic acid, lead nickel salt                                                           |
| 1        |                                                | lead compounds with the exception of those specified elsewhere in the CLP regulation     |
| 1        |                                                | lead alkyls                                                                              |
| 1        | 13424-46-9                                     | lead diazide, lead azide                                                                 |
| 1        | 7758-97-6                                      | lead chromate                                                                            |
| 1        | 301-04-2, 6080-56-4                            | lead di(acetate)                                                                         |
| 1        | 7446-27-7                                      | trilead bis(orthophosphate)                                                              |
| 1        | 1335-32-6                                      | lead acetate, basic                                                                      |
| 1        | 17570-76-2                                     | lead(II) methanesulphonate                                                               |
| 1        | 1344-37-2                                      | lead sulfochromate yellow                                                                |
| 1        | 12656-85-8                                     | lead chromate molybdate sulfate red                                                      |
| 1        | 7784-40-9                                      | lead hydrogen arsenate                                                                   |
| 1        | 7439-92-1                                      | lead                                                                                     |
| 1        | 96-12-8                                        | 1,2-dibromo-3-chloropropane                                                              |
| 1        | 102-06-7                                       | 1,3-diphenylguanidine                                                                    |
| 1        | 629-14-1                                       | 1,2-diethoxyethane                                                                       |
| 1        |                                                | abacavir                                                                                 |
| 1        | 68049-83-2                                     | azafenidin                                                                               |
| 1        | 15245-44-0                                     | lead styphnate                                                                           |
| 1        | 13517-20-9, 15120-21-5                         | perboric acid (H3BO2(O2)), monosodium salt, trihydrate                                   |
| 1        | 10332-33-9, 11138-47-9, 12040-72-1, 37244-98-7 | perboric acid, sodium salt, monohydrate, perboric acid, sodium salt                      |
| 1        | 12008-41-2, 12280-03-4                         | disodium octaborate tetrahydrate, disodium octaborate anhydrous                          |
| 1        | 17804-35-2                                     | benomyl                                                                                  |
| 1        | 485-31-4                                       | binapacryl                                                                               |
| 1        | 56073-10-0                                     | brodifacoum                                                                              |
| 1        | 27366-72-9                                     | (dimethylamino)thioacetamide hydrochloride                                               |
| 1        | 28772-56-7                                     | bromadiolone                                                                             |
| 1        | 84245-12-5                                     | [6,9-dihydro-9-[[2-hydroxy-1-(hydroxymethyl)ethoxy]methyl]-6-oxo-1H-purin-2-yl]acetamide |
| 1        | 74-83-9                                        | bromomethane                                                                             |
| 1        | 75113-37-0                                     | dibutyltin hydrogen borate                                                               |
| 1        | 10043-35-3                                     | boric acid                                                                               |
| 1        | 1303-86-2                                      | diboron trioxide                                                                         |

|   |                                      |                                                                                   |
|---|--------------------------------------|-----------------------------------------------------------------------------------|
| 1 | 12267-73-1                           | tetraboron disodium heptaoxide, hydrate                                           |
| 1 | 13840-56-7                           | orthoboric acid, sodium salt                                                      |
| 1 | 1303-96-4, 1330-43-4,<br>12179-04-3  | disodium tetraborate decahydrate                                                  |
| 1 | 7632-04-4, 10332-33-9,<br>10486-00-7 | sodium peroxometaborate                                                           |
| 1 | 106-94-5                             | 1-bromopropane                                                                    |
| 1 | 7778-50-9                            | potassium dichromate                                                              |
| 1 | 7789-09-5                            | ammonium dichromate                                                               |
| 1 | 7789-12-0, 10588-01-9                | sodium dichromate                                                                 |
| 1 | 7775-11-3                            | sodium chromate                                                                   |
| 1 | 7646-79-9, 7791-13-1                 | cobalt dichloride                                                                 |
| 1 | 10026-24-1, 10124-43-3               | cobalt sulfate                                                                    |
| 1 | 71-48-7, 6147-53-1                   | cobalt di(acetate)                                                                |
| 1 | 10026-22-9, 10141-05-6               | cobalt dinitrate                                                                  |
| 1 | 513-79-1                             | cobalt carbonate                                                                  |
| 1 | 13463-39-3                           | tetracarbonylnickel                                                               |
| 1 | 12054-48-7                           | nickel dihydroxide                                                                |
| 1 | 11113-74-9                           | nickel hydroxide                                                                  |
| 1 | 7786-81-4, 10101-97-0,<br>10101-98-1 | nickel sulfate                                                                    |
| 1 | 12607-70-4                           | [carbonato(2-)]tetrahydroxytrinickel                                              |
| 1 | 65405-96-1                           | [ $\mu$ -[carbonato(2-)-O:O']] dihydroxy trinickel                                |
| 1 | 16337-84-1                           | carbonic acid, nickel salt                                                        |
| 1 | 3333-67-3                            | nickel carbonate                                                                  |
| 1 | 7718-54-9, 7791-20-0                 | nickel dichloride                                                                 |
| 1 | 14216-75-2                           | nitric acid, nickel salt                                                          |
| 1 | 13138-45-9, 13478-00-7               | nickel dinitrate                                                                  |
| 1 | 92129-57-2                           | slimes and sludges, copper electrolytic refining,<br>decopperised, nickel sulfate |
| 1 | 13637-71-3                           | nickel diperchlorate                                                              |
| 1 | 15699-18-0                           | diammonium nickel bis(sulfate)                                                    |
| 1 | 13842-46-1                           | nickel dipotassium bis(sulfate)                                                   |
| 1 | 13770-89-3                           | nickel bis(sulfamidate)                                                           |
| 1 | 14708-14-6                           | nickel bis(tetrafluoroborate)                                                     |
| 1 | 68134-59-8                           | formic acid, copper nickel salt                                                   |
| 1 | 15843-02-4                           | formic acid, nickel salt                                                          |
| 1 | 3349-06-2                            | nickel diformate                                                                  |
| 1 | 14998-37-9                           | nickel acetate                                                                    |
| 1 | 373-02-4, 6018-89-9                  | nickel di(acetate)                                                                |
| 1 | 553-71-9                             | nickel dibenzoate                                                                 |
| 1 | 3906-55-6                            | nickel bis(4-cyclohexylbutyrate)                                                  |
| 1 | 2223-95-2                            | nickel(II) stearate                                                               |
| 1 | 16039-61-5                           | nickel dilactate                                                                  |

|   |            |                                                    |
|---|------------|----------------------------------------------------|
| 1 | 4995-91-9  | nickel(II) octanoate                               |
| 1 | 13462-88-9 | nickel dibromide                                   |
| 1 | 13462-90-3 | nickel diiodide                                    |
| 1 | 10028-18-9 | nickel difluoride                                  |
| 1 | 11132-10-8 | nickel potassium fluoride                          |
| 1 | 26043-11-8 | nickel hexafluorosilicate                          |
| 1 | 15060-62-5 | nickel selenate                                    |
| 1 | 13689-92-4 | nickel dithiocyanate                               |
| 1 | 15586-38-6 | nickel dichromate                                  |
| 1 | 67952-43-6 | nickel dichlorate                                  |
| 1 | 71720-48-4 | ethyl hydrogen sulfate, nickel(II) salt            |
| 1 | 14550-87-9 | nickel dibromate                                   |
| 1 | 93983-68-7 | dimethylhexanoic acid nickel salt                  |
| 1 | 84852-36-8 | (isodecanoato-O)(isononanoato-O)nickel             |
| 1 | 84852-35-7 | (isooctanoato-O)(neodecanoato-O)nickel             |
| 1 | 84852-37-9 | nickel bis(isononanoate)                           |
| 1 | 84852-39-1 | (2-ethylhexanoato-O)(isodecanoato-O)nickel         |
| 1 | 13654-40-5 | nickel(II) palmitate                               |
| 1 | 52625-25-9 | nickel 3,5-bis(tert-butyl)-4-hydroxybenzoate (1:2) |
| 1 | 93920-10-6 | nickel(II) neononanoate                            |
| 1 | 71957-07-8 | bis(D-gluconato-O1,O2)nickel                       |
| 1 | 84776-45-4 | fatty acids, C8-18 and C18-unsatd., nickel salts   |
| 1 | 93920-09-3 | nickel(II) neoundecanoate                          |
| 1 | 3349-08-4  | nickel(II) propionate                              |
| 1 | 7580-31-6  | 2-ethylhexanoic acid, nickel salt                  |
| 1 | 39819-65-3 | nickel bis(benzenesulfonate)                       |
| 1 | 18283-82-4 | citric acid, ammonium nickel salt                  |
| 1 | 85508-44-7 | nickel(II) neodecanoate                            |
| 1 | 85508-43-6 | nickel(II) isodecanoate                            |
| 1 | 85551-28-6 | (isononanoato-O)(neodecanoato-O)nickel             |
| 1 | 29317-63-3 | nickel(II) isooctanoate                            |
| 1 | 85508-46-9 | (isononanoato-O)(isooctanoato-O)nickel             |
| 1 | 85508-45-8 | (2-ethylhexanoato-O)(isononanoato-O)nickel         |
| 1 | 4454-16-4  | nickel bis(2-ethylhexanoate)                       |
| 1 | 85166-19-4 | (isodecanoato-O)(isooctanoato-O)nickel             |
| 1 | 91697-41-5 | fatty acids, C6-19-branched, nickel salts          |
| 1 | 16083-14-0 | nickel(II) trifluoroacetate                        |
| 1 | 22605-92-1 | citric acid, nickel salt                           |
| 1 | 85135-77-9 | (2-ethylhexanoato-O)(neodecanoato-O)nickel         |
| 1 | 51818-56-5 | neodecanoic acid, nickel salt                      |
| 1 | 18721-51-2 | nickel(II) hydrogen citrate                        |
| 1 | 27637-46-3 | nickel isooctanoate                                |
| 1 | 72319-19-8 | 2,7-naphthalenedisulfonic acid, nickel(II) salt    |

|   |                                      |                                                                                                                              |
|---|--------------------------------------|------------------------------------------------------------------------------------------------------------------------------|
| 1 | 1303-00-0                            | gallium arsenide                                                                                                             |
| 1 | 7790-79-6                            | cadmium fluoride                                                                                                             |
| 1 | 10108-64-2, 35658-65-2               | cadmium chloride                                                                                                             |
| 1 | 7790-84-3, 10124-36-4,<br>31119-53-6 | cadmium sulphate                                                                                                             |
| 1 |                                      | tributyltin compounds, with the exception of those specified elsewhere in this annex                                         |
| 1 | 683-18-1                             | dibutyltin dichloride                                                                                                        |
| 1 | 15571-58-1                           | 2-ethylhexyl 10-ethyl-4,4-dioctyl-7-oxo-8-oxa-3,5-dithia-4-stannatetradecanoate                                              |
| 1 | 77-58-7                              | dibutyltin dilaurate                                                                                                         |
| 1 | 7439-97-6                            | Mercury and mercury compounds                                                                                                |
| 1 | 50-32-8, 63466-71-7                  | benzo[a]pyrene                                                                                                               |
| 1 | 111-41-1                             | 2-(2-aminoethylamino)ethanol                                                                                                 |
| 1 | 96-18-4                              | 1,2,3-trichloropropane                                                                                                       |
| 1 | 106-91-2                             | 2,3-epoxypropyl methacrylate                                                                                                 |
| 1 | 109-86-4, 109-87-5                   | 2-methoxyethanol                                                                                                             |
| 1 | 110-80-5                             | 2-ethoxyethanol                                                                                                              |
| 1 | 110-71-4                             | 1,2-dimethoxyethane                                                                                                          |
| 1 | 556-52-5                             | 2,3-epoxypropan-1-ol                                                                                                         |
| 1 | 78-93-3                              | 2-butanone                                                                                                                   |
| 1 | 1589-47-5                            | 2-methoxypropanol                                                                                                            |
| 1 | 111-96-6                             | bis(2-methoxyethyl) ether                                                                                                    |
| 1 | 75-26-3                              | 2-bromopropane                                                                                                               |
| 1 | 112-49-2                             | 1,2-bis(2-methoxyethoxy)ethane                                                                                               |
| 1 | 71868-10-5                           | 2-methyl-1-(4-methylthiophenyl)-2-morpholinopropan-1-one                                                                     |
| 1 | 6807-17-6                            | 4,4-isobutylethylidenediphenol                                                                                               |
| 1 | 80-05-7                              | bisphenol A                                                                                                                  |
| 1 |                                      | ado-trastuzumab emtansine                                                                                                    |
| 1 | 79-06-1, 122775-19-3                 | acrylamide                                                                                                                   |
| 1 | 75-15-0                              | carbon disulphide                                                                                                            |
| 1 | 67-66-3                              | chloroform                                                                                                                   |
| 1 | 32536-52-0                           | diphenylether; octabromo derivate                                                                                            |
| 1 | 96-45-7                              | ethylene thiourea                                                                                                            |
| 1 | 10605-21-7                           | carbendazim                                                                                                                  |
| 1 | 127-19-5                             | dimethylacetamide                                                                                                            |
| 1 | 624-83-9                             | methyl isocyanate                                                                                                            |
| 1 | 68515-50-4                           | 1,2-benzenedicarboxylic acid, dihexyl ester, branched and linear                                                             |
| 1 | 151798-26-4                          | 2-[2-hydroxy-3-(2-chlorophenyl)carbamoyl-1-naphthylazo]-7-[2-hydroxy-3-(3-methylphenyl)carbamoyl-1-naphthylazo]fluoren-9-one |
| 1 | 94723-86-1                           | 2-butyryl-3-hydroxy-5-thiocyclohexan-3-yl-cyclohex-2-en-1-one                                                                |

|   |                     |                                                                               |
|---|---------------------|-------------------------------------------------------------------------------|
| 1 | 110-49-6            | 2-methoxyethyl acetate                                                        |
| 1 | 111-15-9            | 2-ethoxyethyl acetate                                                         |
| 1 | 16118-49-3          | carbetamide                                                                   |
| 1 | 2687-91-4           | N-ethyl-2-pyrrolidone                                                         |
| 1 | 3691-35-8           | chlorophacinone                                                               |
| 1 | 80387-97-9          | 2-ethylhexyl[[[3,5-bis(1,1-dimethylethyl)-4-hydroxyphenyl]methyl]thio]acetate |
| 1 | 68515-42-4          | 1,2-benzenedicarboxylic acid                                                  |
| 1 | 70657-70-4          | 2-methoxypropyl acetate                                                       |
| 1 | 5836-29-3           | coumatetralyl                                                                 |
| 1 | 66-81-9             | cycloheximide                                                                 |
| 1 | 625-45-6            | methoxyacetic acid                                                            |
| 1 | 84777-06-0          | 1,2-benzenedicarboxylic acid, dipentylester, branched and linear              |
| 1 | 85-68-7             | benzyl butyl phthalate                                                        |
| 1 | 94361-06-5          | cyproconazole                                                                 |
| 1 | 56073-07-5          | difenacoum                                                                    |
| 1 | 117-81-7            | bis(2-ethylhexyl) phthalate                                                   |
| 1 | 117-82-8            | bis(2-methoxyethyl) phthalate                                                 |
| 1 | 84-74-2, 93952-11-5 | dibutyl phthalate                                                             |
| 1 | 84-61-7             | dicyclohexyl phthalate                                                        |
| 1 | 84-75-3             | dihexyl phthalate                                                             |
| 1 | 84-69-5             | diisobutyl phthalate                                                          |
| 1 | 7425-14-1           | 2-ethylhexyl-2-ethylhexanoate                                                 |
| 1 | 605-50-5            | diisopentylphthalate                                                          |
| 1 | 3108-42-7           | ammonium nonadecafluorodecanoate                                              |
| 1 | 29081-56-9          | ammonium perfluorooctane sulfonate                                            |
| 1 | 3825-26-1           | ammoniumpentadeca- fluorooctanoate                                            |
| 1 | 70225-14-8          | diethanolamine perfluorooctane sulfonate                                      |
| 1 | 29457-72-5          | lithium perfluorooctane sulfonate                                             |
| 1 | 143860-04-2         | 3-ethyl-2-methyl-2-(3-methylbutyl)-1,3-oxazolidine                            |
| 1 | 84-74-2             | Di-n-butyl phthalate (DBP)                                                    |
| 1 | 335-76-2            | nonadecafluorodecanoic acid                                                   |
| 1 | 375-95-1            | perfluorononan-1-oic acid                                                     |
| 1 | 98-73-7             | 4-tert-butylbenzoic acid                                                      |
| 1 | 104653-34-1         | difethialone                                                                  |
| 1 | 39300-45-3          | dinocap                                                                       |
| 1 | 4149-60-4           | perfluorononan-1-oic acid ammonium salts                                      |
| 1 | 21049-39-8          | perfluorononan-1-oic acid sodium salts                                        |
| 1 | 1763-23-1           | perfluorooctane sulfonic acid                                                 |
| 1 | 131-18-0            | di-n-pentyl phthalate                                                         |
| 1 | 335-67-1            | perfluorooctanoic acid                                                        |
| 1 | 2795-39-3           | potassium perfluorooctanesulfonate                                            |
| 1 | 3830-45-3           | sodium nonadecafluorodecanoate                                                |

|   |                          |                                                                                                                                                                                         |
|---|--------------------------|-----------------------------------------------------------------------------------------------------------------------------------------------------------------------------------------|
| 1 | 98-95-3                  | nitrobenzene                                                                                                                                                                            |
| 1 | 88-85-7                  | dinoseb                                                                                                                                                                                 |
| 1 | 1420-07-1                | dinoterb                                                                                                                                                                                |
| 1 | 106325-08-0, 133855-98-8 | epoxiconazole                                                                                                                                                                           |
| 1 | 37894-46-5               | etacelasil                                                                                                                                                                              |
| 1 | 90035-08-8               | flocoumafen                                                                                                                                                                             |
| 1 | 69806-50-4, 79241-46-6   | fluazifop-butyl                                                                                                                                                                         |
| 1 | 103361-09-7              | flumioxazin                                                                                                                                                                             |
| 1 | 199327-61-2              | 7-methoxy-6-(3-morpholin-4-yl-propoxy)-3H-quinazolin-4-one                                                                                                                              |
| 1 | 3724-43-4                | chloro-N,N-dimethylformiminium chloride                                                                                                                                                 |
| 1 | 85509-19-9               | flusilazole                                                                                                                                                                             |
| 1 | 5571-36-8                | cyclic 3-(1,2-ethanediyllacetale)-estra-5(10),9(11)-diene-3,17-dione                                                                                                                    |
| 1 | 592-62-1                 | methyl-ONN-azoxymethyl acetate                                                                                                                                                          |
| 1 | 77182-82-2               | glufosinate ammonium                                                                                                                                                                    |
| 1 | 288-32-4                 | imidazole                                                                                                                                                                               |
| 1 | 74499-35-7               | phenol, (tetrapropenyl) derivatives                                                                                                                                                     |
| 1 | 65277-42-1               | ketoconazole                                                                                                                                                                            |
| 1 | 330-55-2                 | linuron                                                                                                                                                                                 |
| 1 | 1836-75-5                | nitrofen                                                                                                                                                                                |
| 1 | 119738-06-6              | quizalofop-p-téfuryl                                                                                                                                                                    |
| 1 |                          | salts and esters of dinoseb, with the exception of those specified elsewhere in this Annex                                                                                              |
| 1 | 65996-93-2               | pitch, coal tar, high-temp.                                                                                                                                                             |
| 1 | 183196-57-8              | potassium 1-methyl-3-morpholinocarbonyl-4-[3-(1-methyl-3-morpholinocarbonyl-5-oxo-2-pyrazolin-4-ylidene)-1-propenyl]pyrazole-5-olate                                                    |
| 1 |                          | salts and esters of dinoterb                                                                                                                                                            |
| 1 |                          | reaction mass of: 1,3,5-tris(3-aminomethylphenyl)-1,3,5-(1H,3H,5H)-triazine-2,4,6-trione                                                                                                |
| 1 | 105024-66-6              | silaflluofen                                                                                                                                                                            |
| 1 | 111988-49-9              | thiacloprid                                                                                                                                                                             |
| 1 | 148-24-3                 | quinolin-8-ol                                                                                                                                                                           |
| 1 | 55219-65-3               | triadimenol                                                                                                                                                                             |
| 1 | 68-12-2                  | dimethylformamide                                                                                                                                                                       |
| 1 | 107-21-1                 | Ethylene glycol (ingested)                                                                                                                                                              |
| 1 | 75-12-7                  | formamide                                                                                                                                                                               |
| 1 | 591-78-6                 | hexan-2-one                                                                                                                                                                             |
| 1 | 67-56-1                  | methanol                                                                                                                                                                                |
| 1 |                          | reaction mass of: 4-[[bis-(4-fluorophenyl)methylsilyl]methyl]-4H-1,2,4-triazole                                                                                                         |
| 1 |                          | reaction mass of: disodium 4-(3-ethoxycarbonyl-4-(5-(3-ethoxycarbonyl-5-hydroxy-1-(4-sulfonatophenyl)pyrazol-4-yl)penta-2,4-dienylidene)-4,5-dihydro-5-oxopyrazol-1-yl)benzenesulfonate |

|   |                         |                                      |
|---|-------------------------|--------------------------------------|
| 1 |                         | phenol, 2-dodecyl-, branched         |
| 1 | 24602-86-6              | tridemorph                           |
| 1 | 68694-11-1              | triflumizole                         |
| 1 |                         | phenol, 3-dodecyl-, branched         |
| 1 | 210555-94-5             | phenol, 4-dodecyl-, branched         |
| 1 | 79-16-3                 | methylacetamide                      |
| 1 | 61571-06-0              | tetrahydrothiopyran-3-carboxaldehyde |
| 1 | 121158-58-5             | phenol, dodecyl-, branched           |
| 1 | 106-50-3                | p-phenylenediamine                   |
| 1 | 57044-25-4              | R-glycidol                           |
| 1 | 62-56-6                 | thiourea                             |
| 1 | 154229-18-2             | Abiraterone acetate                  |
| 1 | 115-96-8                | tris(2-chloroethyl)phosphate         |
| 1 | 60-00-4                 | EDTA                                 |
| 1 | 50471-44-8              | vinclozolin                          |
| 1 | 123-39-7                | methylformamide                      |
| 1 | 25155-23-1              | trixyl phosphate                     |
| 1 | 872-50-4                | N-Methylpyrrolidone                  |
| 1 | 1330-43-4               | di-sodium tetraborate anhydrous      |
| 1 |                         | acitretin                            |
| 1 | 10043-35-3 ; 11113-50-1 | boric acid                           |
| 1 | 15120-21-5              | sodium perborate                     |
| 1 | 97-99-4                 | tetrahydro-2-furylmethanol           |
| 1 | 645-05-6                | altretamine                          |
| 1 |                         | afatinib                             |
| 1 |                         | anastrozole                          |
| 1 | 1327-53-3               | arsenic trioxide                     |
| 1 |                         | axitinib                             |
| 1 |                         | azacitidine                          |
| 1 |                         | belinostat                           |
| 1 |                         | bendamustine                         |
| 1 |                         | bexarotene                           |
| 1 |                         | bicalutimide                         |
| 1 |                         | bleomycin                            |
| 1 |                         | bortezomib                           |
| 1 |                         | bosutinib                            |
| 1 |                         | brentuximab vedotin                  |
| 1 |                         | busulfan                             |
| 1 |                         | cabazitaxel                          |
| 1 |                         | cabozantinib                         |
| 1 |                         | capecitabine                         |
| 1 | 41575-94-4              | Carboplatin                          |
| 1 |                         | carfilzomib                          |

|   |            |                       |
|---|------------|-----------------------|
| 1 |            | carmustine            |
| 1 | 305-03-3   | Chlorambucil          |
| 1 |            | cisplatin             |
| 1 | 4291-63-8  | Cladribine            |
| 1 |            | clofarabine           |
| 1 |            | crizotinib            |
| 1 | 147-94-4   | Cytarabine            |
| 1 |            | dabrafenib            |
| 1 | 4342-03-4  | Dacarbazine           |
| 1 |            | dactinomycin          |
| 1 |            | dasatinib             |
| 1 |            | decitabine            |
| 1 |            | degarelix             |
| 1 |            | docetaxel             |
| 1 | 82413-20-5 | droloxifen            |
| 1 |            | enzalutamide          |
| 1 |            | epirubicin            |
| 1 |            | eribulin              |
| 1 |            | erlotinib             |
| 1 |            | estramustine          |
| 1 | 33419-42-0 | Etoposide             |
| 1 |            | everolimus            |
| 1 |            | exemestane            |
| 1 |            | floxuridine           |
| 1 |            | fludarabine           |
| 1 | 51-21-8    | Fluorouracil          |
| 1 | 13311-84-7 | Flutamide             |
| 1 |            | fulvestrant           |
| 1 |            | gemcitabine           |
| 1 |            | gemtuzumab ozogamicin |
| 1 | 127-07-1   | Hydroxyurea           |
| 1 |            | idarubicin            |
| 1 | 3778-73-2  | Ifosfamide            |
| 1 |            | imatinib              |
| 1 |            | irinotecan            |
| 1 |            | ixabepilone           |
| 1 |            | letrozole             |
| 1 |            | lomustine             |
| 1 |            | mechlorethamine       |
| 1 | 148-82-3   | Melphalan             |
| 1 | 6112-76-1  | Mercaptopurine        |
| 1 | 59-05-2    | Methotrexate          |
| 1 |            | mitomycin             |



|   |             |                                                                                        |
|---|-------------|----------------------------------------------------------------------------------------|
| 1 |             | mitotane                                                                               |
| 1 |             | nelarabine                                                                             |
| 1 |             | nilotinib                                                                              |
| 1 |             | omacetaxin                                                                             |
| 1 |             | oxaliplatin                                                                            |
| 1 | 33069-62-4  | Paclitaxel                                                                             |
| 1 |             | pazopanib                                                                              |
| 1 |             | pemetrexed                                                                             |
| 1 | 53910-25-1  | Pentostatin                                                                            |
| 1 | 380610-27-5 | Pertuzumab                                                                             |
| 1 |             | pomalidomide                                                                           |
| 1 |             | ponatinib                                                                              |
| 1 |             | alitretinoin                                                                           |
| 1 |             | ambrisentan                                                                            |
| 1 |             | apomorphine                                                                            |
| 1 | 446-86-6    | Azathioprine                                                                           |
| 1 |             | bosentan                                                                               |
| 1 | 298-46-4    | Carbamazepine                                                                          |
| 1 |             | cetrorelix                                                                             |
| 1 |             | chloramphenicol                                                                        |
| 1 |             | choriogonadotropin                                                                     |
| 1 | 113852-37-2 | Cidofovir                                                                              |
| 1 | 50-41-9     | clomiphene                                                                             |
| 1 | 57109-90-7  | Clorazepate dipotassium                                                                |
| 1 | 64-86-8     | colchicine                                                                             |
| 1 | 50-18-0     | Cyclophosphamide (anhydrous)                                                           |
| 1 |             | cyclosporine                                                                           |
| 1 | 23541-50-6  | Daunorubicin hydrochloride                                                             |
| 1 |             | deferiprone                                                                            |
| 1 |             | dexrazoxane                                                                            |
| 1 | 56-53-1     | Diethylstilbestrol (DES)                                                               |
| 1 |             | dinoprostone                                                                           |
| 1 |             | divalproex                                                                             |
| 1 | 25316-40-9  | Doxorubicin hydrochloride (Adriamycin)                                                 |
| 1 |             | dronedarone                                                                            |
| 1 |             | dutasteride                                                                            |
| 1 |             | entecavir                                                                              |
| 1 |             | ergonovine/methylegonovine                                                             |
| 1 |             | eslicarbazepine                                                                        |
| 1 |             | estradiol                                                                              |
| 1 |             | estrogen/ progesterone combinations ; estrogens, esterified ;<br>estrogens, conjugated |
| 1 | 7280-37-7   | Estropipate                                                                            |

|   |             |                             |
|---|-------------|-----------------------------|
| 1 |             | finasteride                 |
| 1 |             | fingolimod                  |
| 1 |             | fluconazole                 |
| 1 | 76-43-7     | Fluoxymesterone             |
| 1 |             | fosphenytoin                |
| 1 | 82410-32-0  | Ganciclovir                 |
| 1 |             | ganirelix                   |
| 1 |             | gonadotropin, chorionic     |
| 1 | 65807-02-5  | goserelin                   |
| 1 | 220810-26-4 | Histrelin acetate           |
| 1 |             | icatibant                   |
| 1 |             | leflunomide                 |
| 1 |             | lenalidomide                |
| 1 | 74381-53-6  | Leuprolide acetate          |
| 1 |             | liraglutide                 |
| 1 |             | lomitapide                  |
| 1 |             | macitentan                  |
| 1 | 71-58-9     | Medroxyprogesterone acetate |
| 1 | 595-33-5    | Megestrol acetate           |
| 1 | 9002-68-0   | Menotropins                 |
| 1 | 60-56-0     | Methimazole                 |
| 1 | 58-18-4     | Methyltestosterone          |
| 1 |             | mifepristone                |
| 1 |             | mipomersen                  |
| 1 | 59122-46-2  | Misoprostol                 |
| 1 | 70476-82-3  | Mitoxantrone hydrochloride  |
| 1 |             | mycophenolate mofetil       |
| 1 |             | mycophenolic acid           |
| 1 | 86220-42-0  | Nafarelin acetate           |
| 1 | 10024-97-2  | nitrous oxide               |
| 1 |             | ospemifene                  |
| 1 |             | oxcarbazepine               |
| 1 |             | oxytocin                    |
| 1 |             | palifermin                  |
| 1 |             | paliperidone                |
| 1 |             | pamidronate                 |
| 1 |             | paroxetine                  |
| 1 |             | pasireotide                 |
| 1 |             | peginesatide                |
| 1 |             | pentetate calcium trisodium |
| 1 |             | phenoxybenzamine            |
| 1 |             | n-pentyl-isopentylphthalate |
| 1 |             | phenytoin                   |

|   |            |                               |
|---|------------|-------------------------------|
| 1 |            | pralatrexate                  |
| 1 | 54-91-1    | Pipobroman                    |
| 1 |            | plerixafor                    |
| 1 |            | regorafenib                   |
| 1 |            | romidepsin                    |
| 1 | 366-70-1   | Procarbazine hydrochloride    |
| 1 |            | sorafenib                     |
| 1 |            | progestins                    |
| 1 |            | raloxifene                    |
| 1 |            | rasagiline                    |
| 1 |            | sunitinib                     |
| 1 |            | temozolomide                  |
| 1 | 36791-04-5 | Ribavirin                     |
| 1 |            | riociguat                     |
| 1 |            | risperidone                   |
| 1 |            | sirolimus                     |
| 1 | 64-17-5    | Ethanol                       |
| 1 | 108-88-3   | Toluene                       |
| 1 |            | temsirolimus                  |
| 1 | 29767-20-2 | Teniposide                    |
| 1 |            | spironolactone                |
| 1 | 154-42-7   | Thioguanine                   |
| 1 | 18883-66-4 | Streptozocin (streptozotocin) |
| 1 |            | tacrolimus                    |
| 1 | 54965-24-1 | Tamoxifen citrate             |
| 1 |            | topotecan                     |
| 1 |            | toremifene                    |
| 1 |            | telavancin                    |
| 1 | 846-50-4   | Temazepam                     |
| 1 |            | teriflunomide                 |
| 1 |            | trametinib                    |
| 1 |            | testosterone                  |
| 1 |            | triptorelin                   |
| 1 | 50-35-1    | Thalidomide                   |
| 1 |            | valrubicin                    |
| 1 |            | tofacitinib                   |
| 1 | 97240-79-4 | Topiramate                    |
| 1 |            | tretinoin                     |
| 1 |            | ulipristal                    |
| 1 |            | vandetanib                    |
| 1 |            | vemurafenib                   |
| 1 |            | vinorelbine                   |
| 1 | 66-75-1    | Uracil mustard                |

|   |                                 |                                                              |
|---|---------------------------------|--------------------------------------------------------------|
| 1 |                                 | valganciclovir                                               |
| 1 | 99-66-1                         | Valproate (valproic acid)                                    |
| 1 |                                 | vigabatrin                                                   |
| 1 | 143-67-9                        | Vinblastine sulfate                                          |
| 1 | 2068-78-2                       | Vincristine sulfate                                          |
| 1 | 879085-55-9                     | Vismodegib                                                   |
| 1 |                                 | voriconazole                                                 |
| 1 |                                 | vorinostat                                                   |
| 1 | 1330-20-7                       | xylenes                                                      |
| 1 | 81-81-2 ; 5543-57-7 ; 5543-58-8 | warfarin                                                     |
| 1 |                                 | zidovudine                                                   |
| 1 |                                 | ziprasidone                                                  |
| 1 |                                 | zoledronic acid                                              |
| 1 |                                 | zonisamide                                                   |
| 1 |                                 | ziv-aflibercept                                              |
| 2 | 72-55-9                         | 1,1-Dichloro-2,2-bis(p-chloropheny)ethylene (DDE)            |
| 2 | 106-99-0                        | 1,3-butadiene                                                |
| 2 | 111-77-3                        | 2-(2-methoxyethoxy)ethanol                                   |
| 2 | 1746-01-6                       | 2,3,7,8-Tetrachlorodibenzo-p-dioxin (TCDD)                   |
| 2 | 121-14-2                        | 2,4-dinitrotoluene                                           |
| 2 | 606-20-2                        | 2,6-dinitrotoluene                                           |
| 2 | 2040-90-6                       | 2-chloro-6-fluoro-phenol                                     |
| 2 | 88-72-2                         | 2-nitrotoluene                                               |
| 2 | 101-80-4                        | 4,4'-oxydianiline and its salts                              |
| 2 | 84852-15-3 ; 104-40-5           | 4-nonylphenol, branched                                      |
| 2 | 71751-41-2                      | abamectin (combination of avermectin B1a and avermectin B1b) |
| 2 | 34256-82-1                      | acetochlor                                                   |
| 2 | 61-82-5                         | amitrole                                                     |
| 2 | 1912-24-9                       | atrazine                                                     |
| 2 | 71-43-2, 1076-43-3              | benzene                                                      |
| 2 | 1689-84-5                       | bromoxynil                                                   |
| 2 | 1689-99-2                       | bromoxynil octanoate                                         |
| 2 | 94-26-8                         | butyl 4-hydroxybenzoate                                      |
| 2 | 7440-43-9                       | cadmium (non-pyrophoric) ;cadmium (pyrophoric)               |
| 2 | 63-25-2                         | carbaryl                                                     |
| 2 | 143-50-0                        | chlordecone (kepone)                                         |
| 2 | 1333-82-0                       | chromium (vi) trioxide                                       |
| 2 | 120-32-1                        | clorofene                                                    |
| 2 | 420-04-2                        | cyanamide                                                    |
| 2 | 106-89-8                        | epichlorohydrin                                              |
| 2 | 106-93-4                        | ethylene dibromide                                           |
| 2 | 75-21-8                         | ethylene oxide                                               |
| 2 | 60168-88-9                      | fenarimol                                                    |
| 2 | 900-95-8                        | fentin acetate                                               |

|   |            |                                                                                                                                                |
|---|------------|------------------------------------------------------------------------------------------------------------------------------------------------|
| 2 | 76-87-9    | fentin hydroxide                                                                                                                               |
| 2 | 151-67-7   | halothane                                                                                                                                      |
| 2 | 680-31-9   | hexamethylphosphoric triamide                                                                                                                  |
| 2 | 22398-80-7 | indium phosphide                                                                                                                               |
| 2 | 1689-83-4  | ioxynil                                                                                                                                        |
| 2 | 8018-01-7  | mancozeb                                                                                                                                       |
| 2 | 12427-38-2 | maneb                                                                                                                                          |
| 2 | 99-65-0    | m-dinitrobenzene                                                                                                                               |
| 2 | 137-42-8   | metham sodium                                                                                                                                  |
| 2 | 9006-42-2  | metiram                                                                                                                                        |
| 2 | 2385-85-5  | mirex                                                                                                                                          |
| 2 | NoCAS 038  | mixture of 2,3,4,5-tetrachlorobiphenyl (PCB 61), 2,2',4,5,5'-octachlorobiphenyl (PCB 101) and 2,2',3,3',4,4',5,5'-octachlorobiphenyl (PCB 194) |
| 2 | 2212-67-1  | molinate                                                                                                                                       |
| 2 | 88671-89-0 | myclobutanil                                                                                                                                   |
| 2 | 25154-52-3 | nonylphenol                                                                                                                                    |
| 2 | 789-02-6   | o,p'-DDT                                                                                                                                       |
| 2 | 556-67-2   | octamethylcyclotetrasiloxane                                                                                                                   |
| 2 | 50-29-3    | p,p'-DDT = clofenotane                                                                                                                         |
| 2 | NoCAS 004  | PBBs = Brominated Flame retardants = PBB (mixed group of 209 Congeners)                                                                        |
| 2 | 1336-36-3  | PCB                                                                                                                                            |
| 2 | NoCAS 039  | PCB 104 (2,2',4,6,6'-pentachlorobiphenyl)                                                                                                      |
| 2 | NoCAS 041  | PCB 105 (2,3,3',4,4' -pentachlorobiphenyl)                                                                                                     |
| 2 | NoCAS 092  | PCB 114 (2,3,4,4',5-pentachlorobiphenyl)                                                                                                       |
| 2 | 31508-00-6 | PCB 118 (2,3',4,4',5-pentachlorobiphenyl)                                                                                                      |
| 2 | NoCAS 042  | PCB 122 (2,3,3',4,5 -pentachlorobiphenyl)                                                                                                      |
| 2 | NoCAS 037  | PCB 126 (3,3',4,4',5-pentachlorobiphenyl)                                                                                                      |
| 2 | 38380-07-3 | PCB 128 (2,2',3,3',4,4'-hexachlorobiphenyl)                                                                                                    |
| 2 | 35065-27-1 | PCB 153 (2,2',4,4',5,5'-hexachlorobiphenyl)                                                                                                    |
| 2 | 32774-16-6 | PCB 169 (3,3',4,4',5,5'-hexachlorobiphenyl)                                                                                                    |
| 2 | 37680-65-2 | PCB 18 (2,2',5-trichlorobiphenyl)                                                                                                              |
| 2 | 55702-46-0 | PCB 21 (2,3,4-trichlorobiphenyl)                                                                                                               |
| 2 | 7012-37-5  | PCB 28 (2,4,4'-trichlorobiphenyl)                                                                                                              |
| 2 | 2437-79-8  | PCB 47 (2,2',4,4'-tetrachlorobiphenyl)                                                                                                         |
| 2 | 35693-99-3 | PCB 52 (2,2';5,5'-tetrachlorobiphenyl)                                                                                                         |
| 2 | 32598-13-3 | PCB 77 (3,3',4,4'-tetrachlorobiphenyl)                                                                                                         |
| 2 | NoCAS 036  | PCB aroclor 1016                                                                                                                               |
| 2 | 53469-21-9 | PCB aroclor 1242                                                                                                                               |
| 2 | 12672-29-6 | PCB aroclor 1248                                                                                                                               |
| 2 | 11097-69-1 | PCB aroclor 1254                                                                                                                               |
| 2 | 11096-82-5 | PCB aroclor 1260 (clophen A60)                                                                                                                 |
| 2 | NoCAS 087  | PCB138 2,2',3,4,4',5'-hexachlorobiphenyl                                                                                                       |
| 2 | NoCAS 088  | PCB180 2,2',3,4,4',5,5'-heptachlorobiphenyl                                                                                                    |
| 2 | 77-09-8    | phenolphthalein                                                                                                                                |
| 2 | 84-66-2    | diethyl phthalate                                                                                                                              |
| 2 | 26761-40-0 | diisodecyl phthalate                                                                                                                           |

|   |             |                                                                                                                                                                   |
|---|-------------|-------------------------------------------------------------------------------------------------------------------------------------------------------------------|
| 2 | 94-13-3     | propyl 4-hydroxybenzoate                                                                                                                                          |
| 2 | 2439-01-2   | quinomethionate                                                                                                                                                   |
| 2 | 10453-86-8  | resmethrin                                                                                                                                                        |
| 2 | 100-42-5    | styrene                                                                                                                                                           |
| 2 | 2155-70-6   | tributyltin methacrylate                                                                                                                                          |
| 3 | 144177-62-8 | (iR,S/i)-2-amino-3,3-dimethylbutaneamide                                                                                                                          |
| 3 | 143322-57-0 | (iR/i)-5-bromo-3-(1-methyl-2-pyrrolidinylmethyl)-1iH/i-indole                                                                                                     |
| 3 | 79815-20-6  | (iS/i)-2,3-dihydro-1iH/i-indole-2-carboxylic acid                                                                                                                 |
| 3 | 40722-80-3  | (2-chloroethyl)(3-hydroxypropyl)ammoniumchloride                                                                                                                  |
| 3 | 156145-66-3 | (ethenylmethylsilylene)di[(4-methylpentan-2-one)oxime]                                                                                                            |
| 3 | 51229-78-8  | icis/i-1-(3-chloroallyl)-3,5,7-triaza-1-azoniaadamantanechloride                                                                                                  |
| 3 | 149591-38-8 | iN/i,iN/i'-dihexadecyl-iN/i,iN/i'-bis(2-hydroxyethyl)propanediamide                                                                                               |
| 3 | 777891-21-1 | iN/i-[2-(3-acetyl-5-nitrothiophen-2-ylazo)-5-diethylaminophenyl]acetamide                                                                                         |
| 3 |             | iO/i-hexyl-iN/i-ethoxycarbonylthiocarbamate                                                                                                                       |
| 3 | 103122-66-3 | iO/i-isobutyl-iN/i-ethoxycarbonylthiocarbamate                                                                                                                    |
| 3 | 90657-55-9  | itrans/i-4-cyclohexyl-L-prolinemonohydrochloride                                                                                                                  |
| 3 | 13010-47-4  | 1-(2-Chloroethyl)-3-cyclohexyl-1-nitrosourea(CCNU)(Lomustine)                                                                                                     |
| 3 | 288-88-0    | 1,2,4-triazole                                                                                                                                                    |
| 3 | 3194-55-6   | 1,2,5,6,9,10-hexabromocyclododecane                                                                                                                               |
| 3 | 110-88-3    | 1,3,5-trioxan                                                                                                                                                     |
| 3 | 2451-62-9   | 1,3,5-tris(oxiranylmethyl)-1,3,5-triazine-2,4,6-(1iH/i,3iH/i,5iH/i)-trione                                                                                        |
| 3 | 59653-74-6  | 1,3,5-tris-[(2iS/iand2iR/i)-2,3-epoxypropyl]-1,3,5-triazine-2,4,6-(1iH/i,3iH/i,5iH/i)-trione                                                                      |
| 3 | 55-98-1     | 1,4-Butanediol dimethanesulfonate (Busulfan)                                                                                                                      |
| 3 | 123-91-1    | 1,4-dioxacyclohexane                                                                                                                                              |
| 3 | 93107-30-3  | 1-cyclopropyl-6,7-difluoro-1,4-dihydro-4-oxoquinoline-3-carboxylic acid                                                                                           |
| 3 | 111-90-0    | 2-(2-ethoxyethoxy)ethanol                                                                                                                                         |
| 3 | 99610-72-7  | 2-(2-hydroxy-3,5-dinitroanilino)ethanol                                                                                                                           |
| 3 | 5406-86-0   | 2-(4- i tert /i -butylphenyl)ethanol                                                                                                                              |
| 3 | 1464-53-5   | 2,2'-bioxirane                                                                                                                                                    |
| 3 | 96-13-9     | 2,3-dibromopropan-1-ol                                                                                                                                            |
| 3 | 602-01-7    | 2,3-dinitrotoluene                                                                                                                                                |
| 3 | 3033-77-0   | 2,3-epoxypropyltrimethylammonium chloride ...%                                                                                                                    |
| 3 | 3397-62-4   | 2,4-diamino-6-chloro-s-triazine (DACT)                                                                                                                            |
| 3 | 619-15-8    | 2,5-dinitrotoluene                                                                                                                                                |
| 3 | 110-13-4    | 2,5-hexanedione                                                                                                                                                   |
| 3 | 784157-49-9 | 2-{{4-(2-ammoniopropylamino)-6-[4-hydroxy-3-(5-methyl-2-methoxy-4-sulfamoylphenylazo)-2-sulfonatonaphth-7-ylamino]-1,3,5-triazin-2-ylamino}}-2-aminopropylformate |
| 3 | 141-43-5    | 2-aminoethanol                                                                                                                                                    |

|   |             |                                                                                                                         |
|---|-------------|-------------------------------------------------------------------------------------------------------------------------|
| 3 | 79-07-2     | 2-chloracetamide                                                                                                        |
| 3 | 598-78-7    | 2-chloropropionic acid                                                                                                  |
| 3 | 637-92-3    | 2-ethoxy-2-methylpropane                                                                                                |
| 3 | 149-57-5    | 2-ethylhexanoic acid                                                                                                    |
| 3 | 57583-35-4  | 2-ethylhexyl 10-ethyl-4,4-dimethyl-7-oxo-8-oxa-3,5-dithia-4-stannatetradecanoate                                        |
| 3 | 57583-34-3  | 2-ethylhexyl 10-ethyl-4-[[2-[(2-ethylhexyl)oxy]-2-oxoethyl]thio]-4-methyl-7-oxo-8-oxa-3,5-dithia-4-stannatetradecanoate |
| 3 |             | 2-methyl-5-tert-butylthiophenol                                                                                         |
| 3 | 87691-88-1  | 3-(piperazin-1-yl)-benzo[d]isothiazole hydrochloride                                                                    |
| 3 | 610-39-9    | 3,4-dinitrotoluene                                                                                                      |
| 3 | 618-85-9    | 3,5-dinitrotoluene                                                                                                      |
| 3 | 5146-66-7   | 3,7-dimethylocta-2,6-dienitrile                                                                                         |
| 3 | 302-97-6    | 3-oxoandrost-4-ene-17-β-carboxylic acid                                                                                 |
| 3 | 13595-25-0  | 4,4'-(1,3-phenylene-bis(1-methylethylidene))bis-phenol                                                                  |
| 3 | 159939-85-2 | 4-[(3-chlorophenyl)(1H-imidazol-1-yl)methyl]-1,2-benzenediamine dihydrochloride                                         |
| 3 | 1671-49-4   | 4-mesyl-2-nitrotoluene                                                                                                  |
| 3 | 95-80-7     | 4-methyl-im/phenylenediamine                                                                                            |
| 3 | 98-54-4     | 4-tert-butylphenol                                                                                                      |
| 3 | 100-40-3    | 4-vinylcyclohexene                                                                                                      |
| 3 | 115662-06-1 | 5,6,12,13-tetrachloroanthra(2,1,9-idef/i:6,5,10-id/i'ie/i'if/i')diisoquinoline-1,3,8,10(2iH/i,9iH/i)-tetrone            |
| 3 | 17630-75-0  | 5-chloro-1,3-dihydro-2H-indol-2-one                                                                                     |
| 3 | 141-78-6    | ethyl acetate                                                                                                           |
| 3 | 112-15-2    | 2-(2-ethoxyethoxy)ethyl acetate                                                                                         |
| 3 | 123-86-4    | N-butyl acetate                                                                                                         |
| 3 | 59-66-5     | acetazolamide                                                                                                           |
| 3 | 546-88-3    | acetohydroxamic acid                                                                                                    |
| 3 | 67-64-1     | acetone                                                                                                                 |
| 3 | 68515-49-1  | 1,2-benzenedicarboxylic acid, di-C9-11-branched alkyl esters, C10-rich                                                  |
| 3 | 50-76-0     | actinomycin D                                                                                                           |
| 3 | 68475-57-0  | alkanes, C1-2                                                                                                           |
| 3 | 90622-55-2  | alkanes, C1-4, C3-rich                                                                                                  |
| 3 | 68475-58-1  | alkanes, C2-3                                                                                                           |
| 3 | 68475-59-2  | alkanes, C3-4                                                                                                           |
| 3 | 68475-60-5  | alkanes, C4-5                                                                                                           |
| 3 | 302-79-4    | all-trans retinoic acid                                                                                                 |
| 3 | 106-92-3    | allyl glycidyl ether                                                                                                    |
| 3 | 28981-97-7  | Alprazolam                                                                                                              |
| 3 | 665-66-7    | amantadine hydrochloride                                                                                                |
| 3 | 39831-55-5  | amikacin sulfate                                                                                                        |
| 3 | 125-84-8    | aminoglutethimide                                                                                                       |
| 3 |             | aminoglycosides                                                                                                         |
| 3 | 54-62-6     | aminopterin                                                                                                             |
| 3 | 19774-82-4  | amiodarone hydrochloride                                                                                                |

|   |             |                                                                                      |
|---|-------------|--------------------------------------------------------------------------------------|
| 3 | 33089-61-1  | amitraz                                                                              |
| 3 | 14028-44-5  | amoxapine                                                                            |
| 3 |             | anabolic steroids                                                                    |
| 3 | 15375-21-0  | androsta-1,4,9(11)-triene-3,17-dione                                                 |
| 3 |             | Angiotensin converting enzyme (ACE) inhibitors                                       |
| 3 | 117-37-3    | Anisindione                                                                          |
| 3 | 90640-81-6  | Anthracene oil, anthracene paste                                                     |
| 3 | 91995-15-2  | anthracene oil, anthracene paste, anthracene fraction                                |
| 3 | 91995-16-3  | anthracene oil, anthracene paste, carbazole fraction                                 |
| 3 | 91995-17-4  | anthracene oil, anthracene paste, distn. lights                                      |
| 3 | 90640-82-7  | anthracene oil, anthracene-low                                                       |
| 3 | 68131-49-7  | aromatichydrocarbons,Csub6-10/sub,acid-treated,neutralized                           |
| 3 | 90989-41-6  | aromatichydrocarbons,Csub6-10/sub,Csub8/sub-rich                                     |
| 3 | 68475-70-7  | aromatichydrocarbons,Csub6-8/sub,naphtharaffinatepyrolyzate-derived                  |
| 3 | 93571-75-6  | aromatichydrocarbons,Csub7-12/sub,Csub8/sub-rich                                     |
| 3 | 90989-42-7  | aromatichydrocarbons,Csub7-8/sub,dealkylationproducts,distn.residues                 |
| 3 | 90989-38-1  | aromatichydrocarbons,Csub8/sub                                                       |
| 3 | 91995-18-5  | aromatichydrocarbons,Csub8/sub,catalyticreforming-derived                            |
| 3 | 90989-39-2  | aromatichydrocarbons,Csub8-10/sub                                                    |
| 3 | 91995-20-9  | aromatichydrocarbons,Csub8-9/sub,hydrocarbonresinpolymn.by-product                   |
| 3 | 92062-36-7  | aromatichydrocarbons,Csub9-12/sub,benzenedistn.                                      |
| 3 | 7440-38-2   | arsenic (inorganic oxides)                                                           |
| 3 | 1303-11-3   | Indium arsenide                                                                      |
| 3 | 50-78-2     | aspirin                                                                              |
| 3 | 29122-68-7  | atenolol                                                                             |
| 3 | 34031-32-8  | auranofin                                                                            |
| 3 | 65195-55-3  | avermectin B1a (purity ≥80 %)                                                        |
| 3 |             | barbiturates                                                                         |
| 3 | 5534-09-8   | beclomethasone dipropionate                                                          |
| 3 | 82560-54-1  | benfuracarb                                                                          |
| 3 |             | benzodiazepines                                                                      |
| 3 | 65996-88-5  | benzol forerunnings (coal)                                                           |
| 3 | 5411-22-3   | benzphetamine hydrochloride                                                          |
| 3 | 23085-60-1  | benzyl 2,4-dibromobutanoate                                                          |
| 3 | 125051-32-3 | bis(η sup 5 /sup -cyclopentadienyl)-bis(2,6-difluoro-3-[pyrrol-1-yl]-phenyl)titanium |
| 3 | 154-93-8    | bischloroethyl nitrosoarea (BCNU) (carmustine)                                       |
| 3 | 53404-19-6  | bromacil lithium salt                                                                |
| 3 | 56634-95-8  | bromoxynil heptanoate                                                                |
| 3 | 143-81-7    | Butabarbital sodium                                                                  |
| 3 | 106-97-8    | butane (containing ≥ 0,1 % butadiene (203-450-8))                                    |
| 3 | 138164-12-2 | butoxydim                                                                            |
| 3 | 513-78-0    | cadmium carbonate                                                                    |



|   |                        |                                                                                                       |
|---|------------------------|-------------------------------------------------------------------------------------------------------|
| 3 | 21041-95-2             | cadmium hydroxide                                                                                     |
| 3 | 10022-68-1, 10325-94-7 | cadmium nitrate                                                                                       |
| 3 | 1306-19-0              | cadmium oxide (non-pyrophoric)                                                                        |
| 3 | 1306-23-6              | cadmium sulphide                                                                                      |
| 3 | 474-25-9               | chenodiol                                                                                             |
| 3 | 1620-21-9              | chlorcyclizine hydrochloride                                                                          |
| 3 | 58-25-3                | chlordiazepoxide                                                                                      |
| 3 | 438-41-5               | chlordiazepoxide hydrochloride                                                                        |
| 3 | 15545-48-9             | chlorotoluron                                                                                         |
| 3 | 10025-82-8             | chlorure d'indium (forme micrometrique)                                                               |
| 3 | 8001-54-5              | chlorures de benzalkonium                                                                             |
| 3 | 14977-61-8             | chromyl dichloride                                                                                    |
| 3 | 81103-11-9             | clarithromycin                                                                                        |
| 3 | 25122-46-7             | clobetasol propionate                                                                                 |
| 3 | 50-36-2                | cocaine                                                                                               |
| 3 |                        | cocamidopropyl betaine ; lexaine c                                                                    |
| 3 | 52-28-8                | codeine phosphate                                                                                     |
| 3 |                        | conjugated estrogens                                                                                  |
| 3 | 21725-46-2             | cyanazine                                                                                             |
| 3 | 1134-23-2              | cycloate                                                                                              |
| 3 | 108-94-1               | cyclohexanone                                                                                         |
| 3 | 108-91-8               | cyclohexylamine                                                                                       |
| 3 | 120-92-3               | cyclopentanone                                                                                        |
| 3 | 6055-19-2              | cyclophosphamide (hydrated)                                                                           |
| 3 | 101205-02-1            | cycloxydim                                                                                            |
| 3 | 13121-70-5             | cyhexatin                                                                                             |
| 3 | 57966-95-7             | cymoxanil                                                                                             |
| 3 | 17230-88-5             | danazol                                                                                               |
| 3 | 64-73-3                | demeclocycline hydrochloride (internal use)                                                           |
| 3 | 6190-65-4              | des-ethyl atrazine (DEA)                                                                              |
| 3 | 1007-28-9              | des-isopropyl atrazine (DIA)                                                                          |
| 3 |                        | diammonium 1-hydroxy-2-(4-(4-carboxyphenylazo)-2,5-dimethoxyphenylazo)-7-amino-3-naphthalenesulfonate |
| 3 | 439-14-5               | diazepam                                                                                              |
| 3 | 364-98-7               | diazoxide                                                                                             |
| 3 | 79-43-6                | dichloroacetic acid                                                                                   |
| 3 | 97-23-4                | dichlorophene                                                                                         |
| 3 | 120-97-8               | dichlorphenamide                                                                                      |
| 3 | 51338-27-3             | diclofop methyl                                                                                       |
| 3 | 66-76-2                | dicumarol                                                                                             |
| 3 | 64-67-5                | diethyl sulphate                                                                                      |
| 3 | 22494-42-4             | diflunisal                                                                                            |
| 3 | 6190-39-2              | dihydroergotamine mesylate                                                                            |
| 3 | 28553-12-0             | di-isononyl phthalate(dinp)                                                                           |
| 3 | 33286-22-5             | diltiazem hydrochloride                                                                               |
| 3 | 753-73-1               | dimethyltin dichloride                                                                                |
| 3 | 149961-52-4            | dimoxystrobin                                                                                         |
| 3 | 25321-14-6             | dinitrotoluene                                                                                        |

|   |             |                                                                                                                                |
|---|-------------|--------------------------------------------------------------------------------------------------------------------------------|
| 3 | 117-84-0    | di-n-octyl phthalate (DnOP)                                                                                                    |
| 3 | 75980-60-8  | diphenyl(2,4,6-trimethylbenzoyl)phosphine oxide                                                                                |
| 3 | 57-41-0     | Diphenylhydantoin (Phenytoin)                                                                                                  |
| 3 | 573-58-0    | disodium 3,3'-[[1,1'-biphenyl]-4,4'-diylbis(azo)]bis(4-aminonaphthalene-1-sulphonate)                                          |
| 3 | 1937-37-7   | disodium 4-amino-3-[[4'-[(2,4-diaminophenyl)azo]][1,1'-biphenyl]-4-yl]azo]-5-hydroxy-6-(phenylazo)naphthalene-2,7-disulphonate |
| 3 | 138-93-2    | disodium cyanodithioimidocarbonate                                                                                             |
| 3 | 101896-26-8 | distillates (coal tar), benzole fraction, BTX-rich                                                                             |
| 3 | 121620-46-0 | distillates (coal tar), benzole fraction, distn. residues                                                                      |
| 3 | 90640-87-2  | distillates (coal tar), light oils, acid exts.; light oil extract residues, high boiling                                       |
| 3 | 90640-88-3  | distillates (coal tar), light oils, alk. exts.                                                                                 |
| 3 | 101794-90-5 | Distillates (coal tar), light oils, neutral fraction; Light Oil Extract Residues, high boiling                                 |
| 3 | 84650-03-3  | distillates (coal tar), light oils; carbolic Oil                                                                               |
| 3 | 91995-49-2  | distillates (coal tar), naphthalene oil crystn. mother liquor                                                                  |
| 3 | 84650-04-4  | distillates (coal tar), naphthalene oils                                                                                       |
| 3 | 91995-48-1  | distillates (coal tar), naphthalene oils, acid exts.                                                                           |
| 3 | 90640-89-4  | distillates (coal tar), naphthalene oils, alk. exts.                                                                           |
| 3 | 101794-91-6 | distillates (coal tar), naphthalene oils, indole-methylnaphthalene fraction                                                    |
| 3 | 101896-27-9 | distillates (coal tar), naphthalene oils, methylnaphthalene fraction                                                           |
| 3 | 90640-90-7  | distillates (coal tar), naphthalene oils, naphthalene-free, alk. exts.                                                         |
| 3 | 84989-09-3  | distillates (coal tar), naphthalene oils, naphthalene-low                                                                      |
| 3 | 91995-35-6  | distillates (coal), coal tar-residual pyrolysis oils, naphthalene oils                                                         |
| 3 | 85029-51-2  | distillates (coal), coke-oven light oil, naphthalene cut                                                                       |
| 3 | 94114-52-0  | distillates (coal), liq. solvent extn., primary                                                                                |
| 3 | 94114-53-1  | distillates (coal), solvent extn., hydrocracked                                                                                |
| 3 | 94114-57-5  | distillates (coal), solvent extn., hydrocracked hydrogenated middle                                                            |
| 3 | 94114-56-4  | distillates (coal), solvent extn., hydrocracked middle                                                                         |
| 3 | 91995-31-2  | distillates (petroleum), alkene-alkyne manuf. pyrolysis oil, mixed with high-temp. coal tar, indene fraction                   |
| 3 | 68477-34-9  | distillates (petroleum), c sub 3-5 /sub , 2-methyl-2-butene-rich                                                               |
| 3 | 93165-19-6  | distillates (petroleum), c sub 6 /sub -rich                                                                                    |
| 3 | 101316-56-7 | distillates (petroleum), c sub 7-9 /sub , c sub 8 /sub -rich, hydrodesulfurized dearomatized                                   |
| 3 | 68477-35-0  | distillates (petroleum), C3-6, piperylene-rich                                                                                 |
| 3 | 68475-79-6  | distillates (petroleum), catalytic reformed depentanizer                                                                       |
| 3 | 85116-58-1  | distillates (petroleum), catalytic reformed hydrotreated light, C sub 8-12 /sub arom. fraction                                 |
| 3 | 68513-63-3  | distillates (petroleum), catalytic reformed straight-run naphtha overheads                                                     |

|   |            |                                                                                                                                          |
|---|------------|------------------------------------------------------------------------------------------------------------------------------------------|
| 3 | 68477-89-4 | distillates (petroleum), depentanizer overheads                                                                                          |
| 3 | 91995-41-4 | distillates (petroleum), heat-soaked steam-cracked naphtha, c sub 5 /sub -rich                                                           |
| 3 | 67891-79-6 | distillates (petroleum), heavy arom.                                                                                                     |
| 3 | 68410-98-0 | distillates (petroleum), hydrotreated heavy naphtha, deisohexanizer overheads                                                            |
| 3 | 68410-96-8 | distillates (petroleum), hydrotreated middle, intermediate boiling                                                                       |
| 3 | 67891-80-9 | distillates (petroleum), light arom.                                                                                                     |
| 3 | 68410-97-9 | distillates (petroleum), light distillate hydrotreating process, low-boiling                                                             |
| 3 | 68921-08-4 | distillates (petroleum), light straight-run gasoline fractionation stabilizer overheads                                                  |
| 3 | 68955-29-3 | distillates (petroleum), light thermal cracked, debutanized arom.                                                                        |
| 3 | 91995-50-5 | distillates (petroleum), naphtha steam cracking-derived, hydrotreated light arom.                                                        |
| 3 | 91995-53-8 | distillates (petroleum), naphtha steam cracking-derived, solvent-refined light hydrotreated                                              |
| 3 | 68921-09-5 | distillates (petroleum), naphtha unifiner stripper                                                                                       |
| 3 | 68425-29-6 | distillates (petroleum), naphtha-raffinate pyrolyzate-derived, gasoline-blending                                                         |
| 3 | 68477-50-9 | distillates (petroleum), polymd. steam-cracked petroleum distillates, c sub 5-12 /sub fraction                                           |
| 3 | 68477-55-4 | distillates (petroleum), steam-cracked, c sub 5-10 /sub fraction, mixed with light steam-cracked petroleum naphtha c sub 5 /sub fraction |
| 3 | 68477-53-2 | distillates (petroleum), steam-cracked, c sub 5-12 /sub fraction                                                                         |
| 3 | 95009-23-7 | distillates (petroleum), steam-cracked, c sub 8-12 /sub fraction, polymd., distn. lights                                                 |
| 3 | 68410-05-9 | Distillates (petroleum), straight-run light                                                                                              |
| 3 | 68603-00-9 | Distillates (petroleum), thermal cracked naphtha and gas oil                                                                             |
| 3 | 68603-01-0 | Distillates (petroleum), thermal cracked naphtha and gas oil, C sub 5 /sub -dimer-contg.                                                 |
| 3 | 68603-03-2 | Distillates (petroleum), thermal cracked naphtha and gas oil, extractive                                                                 |
| 3 | 1314-62-1  | divanadium pentaoxide                                                                                                                    |
| 3 | 1593-77-7  | dodemorph                                                                                                                                |
| 3 | 31717-87-0 | dodemorph acetate                                                                                                                        |
| 3 | 564-25-0   | Doxycycline (internal use)                                                                                                               |
| 3 | 94088-85-4 | doxycycline calcium (internal use)                                                                                                       |
| 3 | 24390-14-5 | doxycycline hyclate (internal use)                                                                                                       |
| 3 | 17086-28-1 | doxycycline monohydrate (internal use)                                                                                                   |
| 3 | 72-20-8    | endrin                                                                                                                                   |
| 3 |            | environmental tobacco smoke (ets)                                                                                                        |
| 3 | 379-79-3   | ergotamine tartrate                                                                                                                      |
| 3 | 8006-64-2  | essence de terebenthine                                                                                                                  |

|   |             |                                                                                         |
|---|-------------|-----------------------------------------------------------------------------------------|
| 3 | 536-33-4    | ethionamide                                                                             |
| 3 | 759-94-4    | ethyl dipropylthiocarbamate                                                             |
| 3 | 151-56-4    | ethyleneimine                                                                           |
| 3 | 41340-25-4  | etodolac                                                                                |
| 3 | 54350-48-0  | etretinate                                                                              |
| 3 | 84989-12-8  | Extract oils (coal), acidic, tar-base free                                              |
| 3 | 122070-80-8 | extract oils (coal), coal tar residual pyrolysis oils, naphthalene oil, distn. residues |
| 3 | 91995-66-3  | extract oils (coal), coal tar-residual pyrolysis oils, naphthalene oil, redistillate    |
| 3 | 122070-79-5 | extract oils (coal), coal tar-residual pyrolysis oils, naphthalene oils                 |
| 3 | 90640-99-6  | extract oils (coal), light oil                                                          |
| 3 | 90641-00-2  | extract oils (coal), naphthalene oils                                                   |
| 3 | 65996-86-3  | extract oils (coal), tar base                                                           |
| 3 | 68937-63-3  | extract oils (coal), tar base, collidine fraction                                       |
| 3 | 101316-63-6 | extract residues (coal tar), benzole fraction alk., acid ext.                           |
| 3 | 93821-38-6  | extract residues (coal), benzole fraction acid                                          |
| 3 | 91995-61-8  | extract residues (coal), benzole fraction alk., acid ext.                               |
| 3 | 90641-01-3  | extract residues (coal), light oil alk., acid ext.                                      |
| 3 | 101316-62-5 | extract residues (coal), light oil alk., acid ext., indene fraction                     |
| 3 | 90641-02-4  | extract residues (coal), light oil alk., distn. overheads                               |
| 3 | 90641-03-5  | extract residues (coal), light oil alk., indene naphtha fraction                        |
| 3 | 122384-78-5 | extract residues (coal), low temp. coal atar alk.                                       |
| 3 | 90641-04-6  | extract residues (coal), naphthalene oil alk., distn. overheads                         |
| 3 | 90641-05-7  | extract residues (coal), naphthalene oil alk., distn. residues                          |
| 3 | 121620-47-1 | extract residues (coal), naphthalene oil, alk.                                          |
| 3 | 121620-48-2 | extract residues (coal), naphthalene oil, alk., naphthalene-low                         |
| 3 | 65996-87-4  | extract residues (coal), tar oil alk.                                                   |
| 3 | 90641-06-8  | extract residues (coal), tar oil alk., carbonated, limed                                |
| 3 | 73665-18-6  | extract residues (coal), tar oil alk., naphthalene distn. residues                      |
| 3 | 97926-43-7  | extracts (petroleum) heavy naphtha solvent, clay-treated                                |
| 3 | 91995-68-5  | extracts (petroleum), catalytic reformed light naphtha solvent                          |
| 3 | 68477-61-2  | extracts (petroleum), cold-acid, c sub 4-6 /sub                                         |
| 3 | 65996-83-0  | extracts, coal tar oil alk.                                                             |
| 3 | 66441-23-4  | fenoxaprop ethyl                                                                        |
| 3 | 67564-91-4  | fenpropimorph                                                                           |
| 3 | 121181-53-1 | filgrastim                                                                              |
| 3 | 79241-46-6  | fluazifop-p-butyl                                                                       |
| 3 | 79622-59-6  | fluazinam                                                                               |
| 3 | 3385-03-3   | flunisolide                                                                             |
| 3 | 1172-18-5   | flurazepam hydrochloride                                                                |
| 3 | 5104-49-4   | flurbiprofen                                                                            |

|   |             |                                                                                       |
|---|-------------|---------------------------------------------------------------------------------------|
| 3 | 80474-14-2  | fluticasone propionate                                                                |
| 3 | 69409-94-5  | fluvalinate                                                                           |
| 3 | 68476-26-6  | fuel gases                                                                            |
| 3 | 68476-29-9  | fuel gases, crude oil of distillates                                                  |
| 3 | 107910-75-8 | ganciclovir sodium                                                                    |
| 3 | 68606-27-9  | gases (petroleum), alkylation feed                                                    |
| 3 | 68477-65-6  | gases (petroleum), amine system feed                                                  |
| 3 | 68477-66-7  | gases (petroleum), benzene unit hydrodesulfurizer off                                 |
| 3 | 68602-82-4  | gases (petroleum), benzene unit hydrotreater depentanizer overheads                   |
| 3 | 68477-67-8  | gases (petroleum), benzene unit recycle, hydrogen-rich                                |
| 3 | 68477-68-9  | gases (petroleum), blend oil, hydrogen-nitrogen-rich                                  |
| 3 | 68477-69-0  | gases (petroleum), butane splitter overheads                                          |
| 3 | 68602-83-5  | gases (petroleum), c1-5, wet                                                          |
| 3 | 68477-70-3  | gases (petroleum), c2-3-                                                              |
| 3 | 68783-65-3  | gases (petroleum), c2-4, sweetened                                                    |
| 3 | 68477-84-9  | gases (petroleum), C2-return stream                                                   |
| 3 | 68131-75-9  | gases (petroleum), C3-4                                                               |
| 3 | 68477-33-8  | gases (petroleum), C3-4, isobutane-rich                                               |
| 3 | 68477-83-8  | gases (petroleum), C3-5 olefinic-paraffinic alkylation feed                           |
| 3 | 68477-85-0  | gases (petroleum), C4-rich                                                            |
| 3 | 68477-81-6  | gases (petroleum), C6-8 catalytic reformer                                            |
| 3 | 68477-80-5  | gases (petroleum), C6-8 catalytic reformer recycle                                    |
| 3 | 68477-82-7  | gases (petroleum), C6-8 catalytic reformer recycle, hydrogen-rich                     |
| 3 | 68952-76-1  | gases (petroleum), catalytic cracked naphtha debutanizer                              |
| 3 | 68477-73-6  | gases (petroleum), catalytic cracked naphtha depropanizer overhead, c3-rich acid-free |
| 3 | 68409-99-4  | gases (petroleum), catalytic cracked overheads                                        |
| 3 | 68477-74-7  | gases (petroleum), catalytic cracker                                                  |
| 3 | 68477-75-8  | gases (petroleum), catalytic cracker, c1-5-rich                                       |
| 3 | 68783-64-2  | gases (petroleum), catalytic cracking                                                 |
| 3 | 68477-76-9  | gases (petroleum), catalytic polymd. naphtha stabilizer overhead, c2-4-rich           |
| 3 | 68477-77-0  | gases (petroleum), catalytic reformed naphtha stripper overheads                      |
| 3 | 68513-14-4  | gases (petroleum), catalytic reformed straight-run naphtha stabilizer overheads       |
| 3 | 68477-79-2  | gases (petroleum), catalytic reformer, c1-4-rich                                      |
| 3 | 68477-71-4  | gases (petroleum), catalytic-cracked gas oil depropanizer bottoms, C4-rich acid-free  |
| 3 | 68477-72-5  | gases (petroleum), catalytic-cracked naphtha debutanizer bottoms, c3-5-rich           |
| 3 | 68989-88-8  | gases (petroleum), crude distn. And catalytic cracking                                |
| 3 | 68918-99-0  | gases (petroleum), crude oil fractionation off                                        |
| 3 | 68477-86-1  | gases (petroleum), deethanizer overheads                                              |
| 3 | 68919-00-6  | gases (petroleum), dehexanizer off                                                    |
| 3 | 68477-87-2  | gases (petroleum), deisobutanizer tower overheads                                     |

|   |            |                                                                                    |
|---|------------|------------------------------------------------------------------------------------|
| 3 | 68606-34-8 | gases (petroleum), depropanizer bottoms fractionation off                          |
| 3 | 68477-90-7 | gases (petroleum), depropanizer dry, propene-rich                                  |
| 3 | 68477-91-8 | gases (petroleum), depropanizer overheads                                          |
| 3 | 68919-01-7 | gases (petroleum), distillate unifiner desulfurization stripper off                |
| 3 | 68477-92-9 | gases (petroleum), dry sour, gas-concn.-unit-off                                   |
| 3 | 68919-02-8 | gases (petroleum), fluidized catalytic cracker fractionation off                   |
| 3 | 68919-03-9 | gases (petroleum), fluidized catalytic cracker scrubbing secondary absorber off    |
| 3 | 68919-20-0 | gases (petroleum), fluidized catalytic cracker splitter overheads                  |
| 3 | 68513-15-5 | gases (petroleum), full-range straight-run naphtha dehexanizer off                 |
| 3 | 68477-93-0 | gases (petroleum), gas concn. reabsorber distn.                                    |
| 3 | 92045-15-3 | gases (petroleum), gas oil diethanolamine scrubber off                             |
| 3 | 92045-16-4 | gases (petroleum), gas oil hydrodesulfurization effluent                           |
| 3 | 92045-17-5 | gases (petroleum), gas oil hydrodesulfurization purge                              |
| 3 | 68477-94-1 | gases (petroleum), gas recovery plant depropanizer overheads                       |
| 3 | 68477-95-2 | gases (petroleum), girbotol unit feed                                              |
| 3 | 68919-04-0 | gases (petroleum), heavy distillate hydrotreater desulfurization stripper off      |
| 3 | 68513-16-6 | gases (petroleum), hydrocracking depropanizer off, hydrocarbon-rich                |
| 3 | 68783-06-2 | gases (petroleum), hydrocracking low-pressure separator                            |
| 3 | 68477-96-3 | gases (petroleum), hydrogen absorber off                                           |
| 3 | 92045-18-6 | gases (petroleum), hydrogenator effluent flash drum off                            |
| 3 | 68477-97-4 | gases (petroleum), hydrogen-rich                                                   |
| 3 | 68911-58-0 | gases (petroleum), hydrotreated sour kerosine depentanizer stabilizer off          |
| 3 | 68911-59-1 | gases (petroleum), hydrotreated sour kerosine flash drum                           |
| 3 | 68477-98-5 | gases (petroleum), hydrotreater blend oil recycle, hydrogen-nitrogen-rich          |
| 3 | 68477-99-6 | gases (petroleum), isomerized naphtha fractionator, c4-rich, hydrogen sulfide-free |
| 3 | 68919-05-1 | gases (petroleum), light straight run gasoline fractionation stabilizer off        |
| 3 | 68513-17-7 | gases (petroleum), light straight-run naphtha stabilizer off                       |
| 3 | 92045-19-7 | gases (petroleum), naphtha steam cracking high-pressure residual                   |
| 3 | 68919-06-2 | gases (petroleum), naphtha unifiner desulfurization stripper off                   |
| 3 | 68527-15-1 | gases (petroleum), oil refinery gas distn. off                                     |
| 3 | 68814-90-4 | gases (petroleum), platformer products separator off                               |
| 3 | 68919-07-3 | gases (petroleum), platformer stabilizer off, light ends fractionation             |
| 3 | 68919-08-4 | gases (petroleum), preflash tower off, crude distn.                                |
| 3 | 68478-00-2 | gases (petroleum), recycle, hydrogen-rich                                          |
| 3 | 68814-67-5 | gases (petroleum), refinery                                                        |

|   |             |                                                                                                                     |
|---|-------------|---------------------------------------------------------------------------------------------------------------------|
| 3 | 68783-07-3  | gases (petroleum), refinery blend                                                                                   |
| 3 | 68513-18-8  | gases (petroleum), reformer effluent high-pressure flash drum off                                                   |
| 3 | 68513-19-9  | gases (petroleum), reformer effluent low-pressure flash drum off                                                    |
| 3 | 68478-01-3  | gases (petroleum), reformer make-up, hydrogen-rich                                                                  |
| 3 | 68478-02-4  | gases (petroleum), reforming hydrotreater                                                                           |
| 3 | 68478-04-6  | gases (petroleum), reforming hydrotreater make-up, hydrogen-rich                                                    |
| 3 | 68478-03-5  | gases (petroleum), reforming hydrotreater, hydrogen-methane-rich                                                    |
| 3 | 92045-20-0  | gases (petroleum), residue visbaking off                                                                            |
| 3 | 68602-84-6  | gases (petroleum), secondary absorber off, fluidized catalytic cracker overheads fractionator                       |
| 3 | 68955-33-9  | gases (petroleum), sponge absorber off, fluidized catalytic cracker and gas oil desulfurizer overhead fractionation |
| 3 | 92045-22-2  | gases (petroleum), steam-cracker c3-rich                                                                            |
| 3 | 68955-34-0  | gases (petroleum), straight-run naphtha catalytic reformer stabilizer overhead                                      |
| 3 | 68919-09-5  | gases (petroleum), straight-run naphtha catalytic reforming off                                                     |
| 3 | 68919-10-8  | gases (petroleum), straight-run stabilizer off                                                                      |
| 3 | 68919-11-9  | gases (petroleum), tar stripper off                                                                                 |
| 3 | 68478-05-7  | gases (petroleum), thermal cracking distn.                                                                          |
| 3 | 68919-12-0  | gases (petroleum), unifiner stripper off                                                                            |
| 3 | 68955-28-2  | gases (petroleum, light steam-cracked, butadiene conc.                                                              |
| 3 | 86290-81-5  | gasoline                                                                                                            |
| 3 | 93572-29-3  | gasoline, c sub 5-11 /sub , high-octane stabilised reformed                                                         |
| 3 | 8006-61-9   | gasoline, natural                                                                                                   |
| 3 | 68606-10-0  | gasoline, pyrolysis, debutanizer bottoms                                                                            |
| 3 | 94114-03-1  | gasoline, pyrolysis, hydrogenated                                                                                   |
| 3 | 68606-11-1  | gasoline, straight-run, topping-plant                                                                               |
| 3 | 68514-15-8  | gasoline, vapor-recovery                                                                                            |
| 3 | 25812-30-0  | gemfibrozil                                                                                                         |
| 3 | 23092-17-3  | halazepam                                                                                                           |
| 3 | 66852-54-8  | halobetasol propionate                                                                                              |
| 3 | 52-86-8     | haloperidol                                                                                                         |
| 3 | 76-44-8     | heptachlor                                                                                                          |
| 3 | 25637-99-4  | hexabromocyclododecane                                                                                              |
| 3 | 684-16-2    | hexafluoroacetone                                                                                                   |
| 3 | 67485-29-4  | hydramethylnon                                                                                                      |
| 3 | 100801-63-6 | hydrocarbon oils, arom., mixed with polyethylene and polypropylene, pyrolyzed, light oil fraction                   |
| 3 | 100801-65-8 | hydrocarbon oils, arom., mixed with polyethylene, pyrolyzed, light oil fraction                                     |
| 3 | 100801-66-9 | hydrocarbon oils, arom., mixed with polystyrene, pyrolyzed, light oil fraction                                      |
| 3 | 68476-50-6  | hydrocarbons, c sub $\geq 5$ /sub , c sub 5-6 /sub -rich                                                            |

|   |             |                                                                                           |
|---|-------------|-------------------------------------------------------------------------------------------|
| 3 | 68476-47-1  | hydrocarbons, c sub 2-6 /sub , c sub 6-8 /sub catalytic reformer                          |
| 3 | 68476-46-0  | hydrocarbons, c sub 3-11 /sub , catalytic cracker distillates                             |
| 3 | 102110-14-5 | hydrocarbons, c sub 3-6 /sub , c sub 5 /sub -rich, steam-cracked naphtha                  |
| 3 | 92045-63-1  | hydrocarbons, c sub 4-11 /sub , naphtha-cracking, arom.-free                              |
| 3 | 92045-61-9  | hydrocarbons, c sub 4-12 /sub , naphtha-cracking, hydrotreated                            |
| 3 | 91995-38-9  | hydrocarbons, c sub 4-6 /sub , depentanizer lights, arom. hydrotreater                    |
| 3 | 68476-55-1  | hydrocarbons, c sub 5 /sub -rich                                                          |
| 3 | 102110-15-6 | hydrocarbons, c sub 5 /sub -rich, dicyclopentadiene-contg.                                |
| 3 | 93572-36-2  | hydrocarbons, c sub 5-11 /sub , nonaroms.-rich, reforming light fraction                  |
| 3 | 101316-67-0 | hydrocarbons, c sub 6 /sub -rich, hydrotreated light naphtha distillates, solvent-refined |
| 3 | 93763-33-8  | hydrocarbons, c sub 6-11 /sub , hydrotreated, dearomatized                                |
| 3 | 92045-64-2  | hydrocarbons, c sub 6-7 /sub , naphtha-cracking, solvent-refined                          |
| 3 | 101316-66-9 | hydrocarbons, c sub 6-8 /sub , hydrogenated sorption-dearomatized, toluene raffination    |
| 3 | 93572-35-1  | hydrocarbons, c sub 7-12 /sub , c sub $\geq 9$ /sub -arom.-rich, reforming heavy fraction |
| 3 | 92045-62-0  | hydrocarbons, c sub 8-11 /sub , naphtha-cracking, toluene cut                             |
| 3 | 101794-97-2 | hydrocarbons, c sub 8-12 /sub , catalytic cracker distillates                             |
| 3 | 101896-28-0 | hydrocarbons, c sub 8-12 /sub , catalytic cracking, chem. neutralized, sweetened          |
| 3 | 92128-94-4  | hydrocarbons, c sub 8-12 /sub , catalytic-cracking, chem. neutralized                     |
| 3 | 93763-34-9  | hydrocarbons, c sub 9-12 /sub , hydrotreated, dearomatized                                |
| 3 | 68527-16-2  | hydrocarbons, C1-3                                                                        |
| 3 | 68514-31-8  | hydrocarbons, C1-4                                                                        |
| 3 | 68527-19-5  | hydrocarbons, C1-4, debutanizer fraction                                                  |
| 3 | 68514-36-3  | Hydrocarbons, C1-4, sweetened                                                             |
| 3 | 68606-25-7  | Hydrocarbons, C2-4                                                                        |
| 3 | 68476-49-3  | Hydrocarbons, C2-4, C3-rich                                                               |
| 3 | 68606-26-8  | Hydrocarbons, C3                                                                          |
| 3 | 68476-40-4  | Hydrocarbons, C3-4                                                                        |
| 3 | 68512-91-4  | Hydrocarbons, C3-4-rich, petroleum distillate                                             |
| 3 | 87741-01-3  | Hydrocarbons, C4                                                                          |
| 3 | 95465-89-7  | Hydrocarbons, C4, 1,3-butadiene- and isobutene-free                                       |
| 3 | 92045-23-3  | Hydrocarbons, C4, steam-cracker distillate                                                |
| 3 | 68476-42-6  | Hydrocarbons, C4-5                                                                        |



|   |             |                                                                        |
|---|-------------|------------------------------------------------------------------------|
| 3 | 92045-55-1  | Hydrocarbons, hydrotreated light naphtha distillates, solvent-refined  |
| 3 |             | Hydrogen cyanide (HCN) and cyanide salts (CN salts)                    |
| 3 | 57852-57-0  | Idarubicin hydrochloride                                               |
| 3 | 10043-66-0  | Iodine-131                                                             |
| 3 | 3861-47-0   | ioxynil octanoate                                                      |
| 3 | 75-28-5     | isobutane (containing $\geq 0,1$ % butadiene (203-450-8))              |
| 3 | 26675-46-7  | Isoflurane                                                             |
| 3 | 4759-48-2   | Isotretinoin                                                           |
| 3 | 141112-29-0 | isoxaflutole                                                           |
| 3 | 59-92-7     | Levodopa                                                               |
| 3 | 797-63-7    | Levonorgestrel implants                                                |
| 3 | 65996-78-3  | Light oil (coal), coke-oven                                            |
| 3 | 90641-11-5  | Light oil (coal), semi-coking process                                  |
| 3 | 8032-32-4   | Ligroine                                                               |
| 3 | 554-13-2    | Lithium carbonate                                                      |
| 3 | 919-16-4    | Lithium citrate                                                        |
| 3 | 846-49-1    | Lorazepam                                                              |
| 3 | 75330-75-5  | Lovastatin                                                             |
| 3 | 569-64-2    | malachite green hydrochloride                                          |
| 3 | 2437-29-8   | malachite green oxalate                                                |
| 3 | 31431-39-7  | Mebendazole                                                            |
| 3 | 57-53-4     | Meproamate                                                             |
| 3 | 7487-94-7   | mercury dichloride                                                     |
| 3 | 125116-23-6 | metconazole                                                            |
| 3 | 3963-95-9   | Methacycline hydrochloride                                             |
| 3 | 20354-26-1  | Methazole                                                              |
| 3 | 15475-56-6  | Methotrexate sodium                                                    |
| 3 | 77402-05-2  | methyl acrylamidoglycolate (containing $\geq 0,1$ % acrylamide)        |
| 3 | 77402-03-0  | methyl acrylamidomethoxyacetate (containing $\geq 0,1$ % acrylamid)    |
| 3 | 74-87-3     | Methyl chloride                                                        |
| 3 | 108-10-1    | methyl isobutyl ketone (MIBK)                                          |
| 3 |             | methyl-phenylene diamine                                               |
| 3 | 59467-96-8  | Midazolam hydrochloride                                                |
| 3 | 13614-98-7  | minocycline hydrochloride (internal use)                               |
| 3 | 142-59-6    | nabam                                                                  |
| 3 | 8030-30-6   | naphtha                                                                |
| 3 | 90641-12-6  | naphtha (coal), distn. residues                                        |
| 3 | 94114-54-2  | naphtha (coal), solvent extn., hydrocracked                            |
| 3 | 64742-15-0  | naphtha (petroleum), acid-treated                                      |
| 3 | 68603-08-7  | naphtha (petroleum), arom.-contg.                                      |
| 3 | 92045-49-3  | naphtha (petroleum), c sub 4-12 /sub , butane-alkylate, isooctane-rich |
| 3 | 68783-09-5  | naphtha (petroleum), catalytic cracked light distd.                    |
| 3 | 64742-66-1  | naphtha (petroleum), catalytic dewaxed                                 |
| 3 | 68955-35-1  | naphtha (petroleum), catalytic reformed                                |

|   |             |                                                                           |
|---|-------------|---------------------------------------------------------------------------|
| 3 | 85116-59-2  | naphtha (petroleum), catalytic reformed light, arom.-free fraction        |
| 3 | 64742-22-9  | naphtha (petroleum), chemically neutralized heavy                         |
| 3 | 64742-23-0  | naphtha (petroleum), chemically neutralized light                         |
| 3 | 68527-21-9  | naphtha (petroleum), clay-treated full-range straight-run                 |
| 3 | 68527-22-0  | naphtha (petroleum), clay-treated light straight-run                      |
| 3 | 64741-64-6  | naphtha (petroleum), full-range alkylate                                  |
| 3 | 68527-27-5  | naphtha (petroleum), full-range alkylate, butane-contg.                   |
| 3 | 68513-02-0  | naphtha (petroleum), full-range coker                                     |
| 3 | 68919-37-9  | naphtha (petroleum), full-range reformed                                  |
| 3 | 64741-42-0  | naphtha (petroleum), full-range straight-run                              |
| 3 | 64741-65-7  | naphtha (petroleum), heavy alkylate                                       |
| 3 | 64741-54-4  | naphtha (petroleum), heavy catalytic cracked                              |
| 3 | 92045-50-6  | naphtha (petroleum), heavy catalytic cracked, sweetened                   |
| 3 | 64741-68-0  | naphtha (petroleum), heavy catalytic reformed                             |
| 3 | 64741-78-2  | naphtha (petroleum), heavy hydrocracked                                   |
| 3 | 92045-51-7  | naphtha (petroleum), heavy steam-cracked, hydrogenated                    |
| 3 | 101631-20-3 | naphtha (petroleum), heavy straight run, arom.-contg.                     |
| 3 | 64741-41-9  | naphtha (petroleum), heavy straight-run                                   |
| 3 | 64741-83-9  | naphtha (petroleum), heavy thermal cracked                                |
| 3 | 101316-76-1 | naphtha (petroleum), hydrodesulfurized full-range coker                   |
| 3 | 92045-52-8  | naphtha (petroleum), hydrodesulfurized full-range                         |
| 3 | 64742-73-0  | naphtha (petroleum), hydrodesulfurized light                              |
| 3 | 92045-53-9  | naphtha (petroleum), hydrodesulfurized light, dearomatized                |
| 3 | 85116-60-5  | naphtha (petroleum), hydrodesulfurized thermal cracked light              |
| 3 | 64742-82-1  | naphtha (petroleum), hydrodesulphurized heavy                             |
| 3 | 64742-48-9  | naphtha (petroleum), hydrotreated heavy                                   |
| 3 | 64742-49-0  | naphtha (petroleum), hydrotreated light                                   |
| 3 | 92045-57-3  | naphtha (petroleum), hydrotreated light steam-cracked                     |
| 3 | 85116-61-6  | naphtha (petroleum), hydrotreated light, cycloalkane-contg.               |
| 3 | 64741-70-4  | naphtha (petroleum), isomerization                                        |
| 3 | 92045-58-4  | naphtha (petroleum), isomerization, c sub 6 /sub - fraction               |
| 3 | 64741-66-8  | naphtha (petroleum), light alkylate                                       |
| 3 | 64741-55-5  | naphtha (petroleum), light catalytic cracked                              |
| 3 | 92045-59-5  | naphtha (petroleum), light catalytic cracked sweetened                    |
| 3 | 64741-63-5  | naphtha (petroleum), light catalytic reformed                             |
| 3 | 68513-03-1  | naphtha (petroleum), light catalytic reformed, arom.-free                 |
| 3 | 92201-97-3  | naphtha (petroleum), light heat-soaked, steam-cracked                     |
| 3 | 64741-69-1  | naphtha (petroleum), light hydrocracked                                   |
| 3 | 64742-83-2  | naphtha (petroleum), light steam-cracked                                  |
| 3 | 68527-23-1  | naphtha (petroleum), light steam-cracked arom.                            |
| 3 | 68527-26-4  | naphtha (petroleum), light steam-cracked, debenzenized                    |
| 3 | 98219-46-6  | naphtha (petroleum), light steam-cracked, debenzenized, thermally treated |

|   |                             |                                                                |
|---|-----------------------------|----------------------------------------------------------------|
| 3 | 93165-55-0                  | naphtha (petroleum), light steam-cracked, hydrogenated         |
| 3 | 98219-47-7                  | naphtha (petroleum), light steam-cracked, thermally treated    |
| 3 | 64741-46-4                  | naphtha (petroleum), light straight-run                        |
| 3 | 64741-74-8                  | naphtha (petroleum), light thermal cracked                     |
| 3 | 92045-65-3                  | naphtha (petroleum), light thermal cracked, sweetened          |
| 3 | 92045-60-8                  | naphtha (petroleum), light, c sub 5 /sub -rich, sweetened      |
| 3 | 68783-66-4                  | naphtha (petroleum), light, sweetened                          |
| 3 | 64741-92-0                  | naphtha (petroleum), solvent-refined heavy                     |
| 3 | 64741-84-0                  | naphtha (petroleum), solvent-refined light                     |
| 3 | 68516-20-1                  | naphtha (petroleum), steam-cracked middle arom.                |
| 3 | 64741-87-3                  | naphtha (petroleum), sweetened                                 |
| 3 | 101795-01-1                 | naphtha (petroleum), sweetened light                           |
| 3 | 68783-12-0                  | naphtha (petroleum), unsweetened                               |
| 3 | 64741-48-6                  | natural gas (petroleum), raw liq. mix                          |
| 3 | 68919-39-1                  | natural gas condensates                                        |
| 3 | 64741-47-5                  | natural gas condensates (petroleum)                            |
| 3 | 1405-10-3                   | neomycin sulfate (internal use)                                |
| 3 | 56391-57-2                  | netilmicin sulfate                                             |
| 3 | 110-54-3                    | n-hexane                                                       |
| 3 | 54-11-5                     | nicotine                                                       |
| 3 | 21829-25-4                  | nifedipine                                                     |
| 3 | 66085-59-4                  | nimodipine                                                     |
| 3 | 1929-82-4                   | nitrapyrin                                                     |
| 3 | 67-20-9                     | nitrofurantoin                                                 |
| 3 | 51-75-2                     | nitrogen mustard (mechlorethamine)                             |
| 3 | 55-86-7                     | nitrogen mustard hydrochloride (mechlorethamine hydrochloride) |
| 3 | 68-22-4 ; 57-63-6 ; 72-33-3 | norethisterone (norethindrone) ; ethinyl estradiol ; mestranol |
| 3 | 51-98-9                     | norethisterone acetate (norethindrone acetate)                 |
| 3 | 6533-00-2                   | norgestrel                                                     |
| 3 | 71-23-8                     | n-propanol                                                     |
| 3 | 528-29-0                    | o-dinitrobenzene                                               |
| 3 | 39807-15-3                  | oxadiargyl                                                     |
| 3 | 19666-30-9                  | oxadiazon                                                      |
| 3 | 604-75-1                    | oxazepam                                                       |
| 3 | 301-12-2                    | oxydemeton methyl                                              |
| 3 | 434-07-1                    | oxymetholone                                                   |
| 3 | 79-57-2                     | oxytetracycline (internal use)                                 |
| 3 | 2058-46-0                   | oxytetracycline hydrochloride (internal use)                   |
| 3 | 115-67-3                    | paramethadione                                                 |
| 3 | 100-25-4                    | p-dinitrobenzene                                               |
| 3 | 66246-88-6                  | penconazole                                                    |
| 3 | 52-67-5                     | penicillamine                                                  |
| 3 | 57-33-0                     | pentobarbital sodium                                           |
| 3 | 94-36-0                     | peroxyde de dibenzoyle                                         |
| 3 | 68476-85-7                  | petroleum gases, liquefied                                     |

|   |             |                                                                                                                                    |
|---|-------------|------------------------------------------------------------------------------------------------------------------------------------|
| 3 | 68476-86-8  | petroleum gases, liquefied, sweetened                                                                                              |
| 3 | 92045-80-2  | petroleum gases, liquefied, sweetened, c4 fraction                                                                                 |
| 3 | 68514-79-4  | petroleum products, hydrofiner-powerformer reformates                                                                              |
| 3 | 68607-11-4  | petroleum products, refinery gases                                                                                                 |
| 3 | 63-98-9     | phenacemide                                                                                                                        |
| 3 | 84988-93-2  | phenols, ammonia liquor ext.                                                                                                       |
| 3 | 91079-47-9  | phenols, c sub 9-11 /sub                                                                                                           |
| 3 | 435-97-2    | phenprocoumon                                                                                                                      |
| 3 | 638-21-1    | phenylphosphine                                                                                                                    |
| 3 | 14816-18-3  | phoxim                                                                                                                             |
| 3 | 53306-54-0  | phtalate de di-2-propylheptyle                                                                                                     |
| 3 | 68515-49-1  | diisodecyl phthalate                                                                                                               |
| 3 | 131-16-8    | dipropyl phthalate                                                                                                                 |
| 3 | 2062-78-4   | pimozide                                                                                                                           |
| 3 | 110-85-0    | piperazine                                                                                                                         |
| 3 | 142-64-3    | piperazine dihydrochloride                                                                                                         |
| 3 | 6094-40-2   | piperazine hydrochloride                                                                                                           |
| 3 | 1951-97-9   | piperazine phosphate                                                                                                               |
| 3 | 18378-89-7  | Plicamycin                                                                                                                         |
| 3 |             | polybrominated biphenyls                                                                                                           |
| 3 |             | polychlorinated biphenyls                                                                                                          |
| 3 | 7789-00-6   | potassium chromate                                                                                                                 |
| 3 | 128-03-0    | potassium dimethyldithiocarbamate                                                                                                  |
| 3 | 81131-70-6  | pravastatin sodium                                                                                                                 |
| 3 | 125-02-0    | prednisolone sodium phosphate                                                                                                      |
| 3 | 139001-49-3 | profoxydim                                                                                                                         |
| 3 | 2312-35-8   | Propargite                                                                                                                         |
| 3 | 139-40-2    | Propazine                                                                                                                          |
| 3 | 75-56-9     | propylene oxide                                                                                                                    |
| 3 | 2122-19-2   | propylenethiourea                                                                                                                  |
| 3 | 51-52-5     | propylthiouracil                                                                                                                   |
| 3 | 68391-11-7  | pyridine, alkyl derivs.                                                                                                            |
| 3 | 58-14-0     | pyrimethamine                                                                                                                      |
| 3 | 36735-22-5  | quazepam                                                                                                                           |
| 3 | 76578-14-8  | quizalofop-ethyl                                                                                                                   |
| 3 | 68410-71-9  | raffinates (petroleum), catalytic reformer ethylene glycol-water countercurrent exts.                                              |
| 3 | 68425-35-4  | raffinates (petroleum), reformer, lurgi unit-sepd.                                                                                 |
| 3 | 97722-19-5  | raffinates (petroleum), steam-cracked C4 fraction cuprous ammonium acetate extn., C3-5 and C3-5 unsatd., butadiene-free            |
| 3 |             | reaction mass of: 4,7-bis(mercaptomethyl)-3,6,9-trithia-1,11-undecanedithiol                                                       |
| 3 | 163879-69-4 | reaction mass of: 5-[(4-[(7-amino-1-hydroxy-3-sulfo-2-naphthyl)azo]-2,5-diethoxyphenyl)azo]-2-[(3-phosphonophenyl)azo]benzoic acid |

|   |             |                                                                                                                             |
|---|-------------|-----------------------------------------------------------------------------------------------------------------------------|
| 3 |             | reaction mass of: Ca salicylates (branched C sub 10-14 /sub and C sub 18-30 /sub alkylated)                                 |
| 3 |             | reaction mass of: dimethyl (2-(hydroxymethylcarbamoyl)ethyl)phosphonate                                                     |
| 3 |             | reaction mass of: triammonium 6-amino-3-((2,5-diethoxy-4-(3-phosphonophenyl)azo)phenyl)azo-4-hydroxy-2-naphthalenesulfonate |
| 3 | 68478-16-0  | residual oils (petroleum), deisobutanizer tower                                                                             |
| 3 | 92061-92-2  | residues (coal tar), anthracene oil distn.                                                                                  |
| 3 | 68513-66-6  | residues (petroleum), alkylation splitter, c4-rich                                                                          |
| 3 | 68478-12-6  | residues (petroleum), butane splitter bottoms                                                                               |
| 3 | 68478-15-9  | residues (petroleum), c sub 6-8 /sub catalytic reformer                                                                     |
| 3 | 102110-55-4 | residues (petroleum), steam-cracked light, arom.                                                                            |
| 3 |             | retinol/retinyl esters, when in daily dosages in excess of 10,000 iu, or 3,000 retinol equivalents                          |
| 3 | 13292-46-1  | rifampin                                                                                                                    |
| 3 |             | salts of bromoxynil                                                                                                         |
| 3 |             | salts of ioxynil                                                                                                            |
| 3 | 309-43-3    | Secobarbital sodium                                                                                                         |
| 3 | 114466-38-5 | Sermorelin acetate                                                                                                          |
| 3 | 130328-20-0 | silver zinc zeolite (zeolite, Ita framework type, surface-modified with silver and zinc ions)                               |
| 3 | 122-34-9    | simazine                                                                                                                    |
| 3 | 128-04-1    | sodium dimethyldithiocarbamate                                                                                              |
| 3 | 62-74-8     | sodium fluoroacetate                                                                                                        |
| 3 | 65996-79-4  | solvent naphtha (coal)                                                                                                      |
| 3 | 85536-19-2  | solvent naphtha (coal), coumarone-styrene contg.                                                                            |
| 3 | 85536-17-0  | solvent naphtha (coal), light                                                                                               |
| 3 | 85536-20-5  | solvent naphtha (coal), xylene-styrene cut                                                                                  |
| 3 | 92062-15-2  | solvent naphtha (petroleum), hydrotreated light naphthenic                                                                  |
| 3 | 64742-89-8  | solvent naphtha (petroleum), light aliph.                                                                                   |
| 3 | 64742-95-6  | solvent naphtha (petroleum), light arom.                                                                                    |
| 3 | 68512-78-7  | solvent naphtha (petroleum), light arom., hydrotreated                                                                      |
| 3 | 203313-25-1 | spirotetramat                                                                                                               |
| 3 | 118134-30-8 | spiroxamine                                                                                                                 |
| 3 | 8052-41-3   | stoddard solvent                                                                                                            |
| 3 | 3810-74-0   | streptomycin sulfate                                                                                                        |
| 3 | 99105-77-8  | sulcotrione                                                                                                                 |
| 3 | 599-79-1    | sulfasalazine (salicylazosulfapyridine)                                                                                     |
| 3 | 7446-09-5   | sulfur dioxide                                                                                                              |
| 3 | 38194-50-2  | Sulindac                                                                                                                    |
| 3 | 68478-21-7  | tail gas (petroleum), catalytic cracked clarified oil and thermal cracked vacuum residue fractionation reflux drum          |
| 3 | 68307-98-2  | tail gas (petroleum), catalytic cracked distillate and catalytic cracked naphtha fractionation absorber                     |
| 3 | 68952-77-2  | tail gas (petroleum), catalytic cracked distillate and naphtha stabilizer                                                   |

|   |            |                                                                                                          |
|---|------------|----------------------------------------------------------------------------------------------------------|
| 3 | 68478-22-8 | tail gas (petroleum), catalytic cracked naphtha stabilization absorber                                   |
| 3 | 68478-25-1 | tail gas (petroleum), catalytic cracker refractation absorber                                            |
| 3 | 68478-24-0 | tail gas (petroleum), catalytic cracker, catalytic reformer and hydrodesulfurizer combined fractionater  |
| 3 | 68952-79-4 | tail gas (petroleum), catalytic hydrodesulfurized naphtha separator                                      |
| 3 | 68307-99-3 | tail gas (petroleum), catalytic polymn. naphtha fractionation stabilizer                                 |
| 3 | 68478-26-2 | tail gas (petroleum), catalytic reformed naphtha fractionation stabilizer                                |
| 3 | 68308-00-9 | tail gas (petroleum), catalytic reformed naphtha fractionation stabilizer, hydrogen sulfide-free         |
| 3 | 68478-27-3 | tail gas (petroleum), catalytic reformed naphtha separator                                               |
| 3 | 68478-28-4 | tail gas (petroleum), catalytic reformed naphtha stabilizer                                              |
| 3 | 68478-29-5 | tail gas (petroleum), cracked distillate hydrotreater separator                                          |
| 3 | 68308-01-0 | tail gas (petroleum), cracked distillate hydrotreater stripper                                           |
| 3 | 68308-03-2 | tail gas (petroleum), gas oil catalytic cracking absorber                                                |
| 3 | 68308-04-3 | tail gas (petroleum), gas recovery plant                                                                 |
| 3 | 68308-05-4 | tail gas (petroleum), gas recovery plant deethanizer                                                     |
| 3 | 68308-06-5 | tail gas (petroleum), hydrodesulfurized distillate and hydrodesulfurized naphtha fractionator, acid-free |
| 3 | 68478-30-8 | tail gas (petroleum), hydrodesulfurized straight-run naphtha separator                                   |
| 3 | 68308-07-6 | tail gas (petroleum), hydrodesulfurized vacuum gas oil stripper, hydrogen sulfide-free                   |
| 3 | 68308-08-7 | tail gas (petroleum), isomerized naphtha fractionation stabilizer                                        |
| 3 | 68308-09-8 | tail gas (petroleum), light straight-run naphtha stabilizer, hydrogen sulfide-free                       |
| 3 | 68308-11-2 | tail gas (petroleum), propane-propylene alkylation feed prep deethanizer                                 |
| 3 | 68478-32-0 | tail gas (petroleum), saturate gas plant mixed stream, c4-rich                                           |
| 3 | 68478-33-1 | tail gas (petroleum), saturate gas recovery plant, c1-2-rich                                             |
| 3 | 68308-10-1 | tail gas (petroleum), straight-run distillate hydrodesulfurizer, hydrogen sulfide-free                   |
| 3 | 68952-80-7 | tail gas (petroleum), straight-run naphtha hydrodesulfurizer                                             |
| 3 | 68952-82-9 | tail gas (petroleum), thermal cracked hydrocarbon fractionation stabilizer, petroleum coking             |
| 3 | 68952-81-8 | tail gas (petroleum), thermal-cracked distillate, gas oil and naphtha absorber                           |
| 3 | 68308-12-3 | tail gas (petroleum), vacuum gas oil hydrodesulfurizer, hydrogen sulfide-free                            |
| 3 | 68478-34-2 | tail gas (petroleum), vacuum residues thermal cracker                                                    |
| 3 | 84989-07-1 | tar acids, 3,5-xyleneol fraction                                                                         |

|   |             |                                                                                                                 |
|---|-------------|-----------------------------------------------------------------------------------------------------------------|
| 3 | 92062-22-1  | tar acids, brown-coal gasification                                                                              |
| 3 | 94114-29-1  | tar acids, brown-coal, c sub 2 /sub -alkylphenol fraction                                                       |
| 3 | 101316-86-3 | tar acids, brown-coal, crude                                                                                    |
| 3 | 65996-85-2  | tar acids, coal, crude                                                                                          |
| 3 | 92062-26-5  | tar acids, cresylic                                                                                             |
| 3 | 68555-24-8  | tar acids, cresylic, residues                                                                                   |
| 3 | 68815-21-4  | tar acids, cresylic, sodium salts, caustic solns.                                                               |
| 3 | 96690-55-0  | tar acids, distn. residues                                                                                      |
| 3 | 84989-03-7  | tar acids, ethylphenol fraction                                                                                 |
| 3 | 84989-04-8  | tar acids, methylphenol fraction                                                                                |
| 3 | 84989-05-9  | tar acids, polyalkylphenol fraction                                                                             |
| 3 | 68477-23-6  | tar acids, residues, distillates, first-cut                                                                     |
| 3 | 84989-06-0  | tar acids, xylenol fraction                                                                                     |
| 3 | 92062-27-6  | tar bases, coal, aniline fraction                                                                               |
| 3 | 92062-28-7  | tar bases, coal, collidine fraction                                                                             |
| 3 | 65996-84-1  | tar bases, coal, crude                                                                                          |
| 3 | 92062-29-8  | tar bases, coal, distn. residues                                                                                |
| 3 | 91082-52-9  | tar bases, coal, lutidine fraction                                                                              |
| 3 | 92062-33-4  | tar bases, coal, picoline fraction                                                                              |
| 3 | 70321-67-4  | tar bases, coal, quinoline derivs. fraction                                                                     |
| 3 | 91082-53-0  | tar bases, coal, toluidine fraction                                                                             |
| 3 | 68513-87-1  | tar bases, quinoline derivs.                                                                                    |
| 3 | 94114-40-6  | tar oils, brown-coal                                                                                            |
| 3 | 65996-82-9  | tar oils, coal                                                                                                  |
| 3 | 101316-87-4 | tar oils, coal, low-temp.                                                                                       |
| 3 | 107534-96-3 | tebuconazole                                                                                                    |
| 3 | 335104-84-2 | tembotrione                                                                                                     |
| 3 | 149979-41-9 | tepraloxymid                                                                                                    |
| 3 | 5902-51-2   | terbacil                                                                                                        |
| 3 | 58-20-8     | testosterone cypionate                                                                                          |
| 3 | 315-37-7    | testosterone enanthate                                                                                          |
| 3 | 127-18-4    | tetrachloroethylene                                                                                             |
| 3 | 60-54-8     | tetracycline (internal use)                                                                                     |
| 3 | 64-75-5     | tetracycline hydrochloride (internal use)                                                                       |
| 3 | 7226-23-5   | tetrahydro-1,3-dimethyl-1 <i>h</i> /i -pyrimidin-2-one                                                          |
| 3 | 2602-46-2   | tetrasodium 3,3'-[[1,1'-biphenyl]-4,4'-diylbis(azo)]bis[5-amino-4-hydroxynaphthalene-2,7-disulphonate]          |
| 3 | 23564-05-8  | thiophanate methyl                                                                                              |
| 3 |             | tobacco smoke (primary)                                                                                         |
| 3 | 49842-07-1  | tobramycin sulfate                                                                                              |
| 3 | 95-70-5     | 2-methyl-p-phenylenediamine                                                                                     |
| 3 | 96314-26-0  | trans-4-phenyl-L-proline                                                                                        |
| 3 | 43121-43-3  | triadimefon                                                                                                     |
| 3 | 221354-37-6 | triammonium 4-[4-[7-(4-carboxylatoanilino)-1-hydroxy-3-sulfonato-2-naphthylazo]-2,5-dimethoxyphenylazo]benzoate |
| 3 | 28911-01-5  | triazolam                                                                                                       |
| 3 | 79-01-6     | trichloroethylene                                                                                               |

|   |                                                     |                                                                                                                               |
|---|-----------------------------------------------------|-------------------------------------------------------------------------------------------------------------------------------|
| 3 | 993-16-8                                            | trichloromethylstannane                                                                                                       |
| 3 | 38260-01-4                                          | trientine hydrochloride                                                                                                       |
| 3 | 26644-46-2                                          | triforine                                                                                                                     |
| 3 | 13647-35-3                                          | trilostane                                                                                                                    |
| 3 | 127-48-0                                            | trimethadione                                                                                                                 |
| 3 | 82952-64-5                                          | trimetrexate glucuronate                                                                                                      |
| 3 | 51-79-6                                             | urethane (ethyl carbamate)                                                                                                    |
| 3 | 97048-13-0                                          | urofollitropin                                                                                                                |
| 3 | 20108-78-5                                          | valinamide                                                                                                                    |
| 3 | 106-87-6                                            | vinyl cyclohexene dioxide (4-vinyl-1-cyclohexene diepoxide)                                                                   |
| 3 | 64742-48-9 ; 64742-88-7 ;<br>64742-82-1 ; 8052-41-3 | white-spirit                                                                                                                  |
| 3 | 111406-87-2                                         | zileuton                                                                                                                      |
| 3 | 5216-25-1                                           | A, $\alpha,\alpha,4$ -tetrachlorotoluene                                                                                      |
| 3 | 25383-07-7                                          | $\alpha$ -phenylethylammonium (-)-(1 <i>i</i> R/ <i>i</i> , 2 <i>i</i> S/ <i>i</i> )-(1,2-epoxypropyl)phosphonate monohydrate |
